# Supplementary material
Source: Royal Society of Chemistry journal article supplement (doi:10.1039/d5tc04494d)
Supplement: d5tc04494d1.pdf [file d5tc04494d1.pdf]

# Transport characteristics of 2DHG in p-GaN/AlGaN/GaN heterojunction: impact of Mg dopant activation

*Anita Patelli<sup>1,2</sup>, Gabriele Seguini<sup>1, \*</sup>, Silvia Vangelista<sup>3</sup>, Simona Spadoni<sup>3</sup>, Raffaella Pezzuto<sup>3</sup>, Luisito Livellara<sup>3</sup>, Francesca Milanese<sup>3</sup>, Paolo Colpani<sup>3</sup>, Michele Perego<sup>1</sup>*

<sup>1</sup> CNR-IMM, Unit of Agrate Brianza, Via C. Olivetti 2, 20864 Agrate Brianza, Italy

<sup>2</sup> Università del Piemonte Orientale “A. Avogadro”, Viale T. Michel 11, 15121 Alessandria, Italy

<sup>3</sup> STMicroelectronics, Via C. Olivetti 2, 20864, Agrate Brianza, Italy

\* Corresponding authors: [gabriele.seguini@cnr.it](mailto:gabriele.seguini@cnr.it)

**SUPPLEMENTARY MATERIAL**

**Figure 1:** Sheet resistance (a), carrier concentration (b), and mobility (c) at room temperature as a function of annealing temperature for two different annealing atmospheres: N<sub>2</sub> (orange squares) and N<sub>2</sub> + O<sub>2</sub> (green circles). The dashed blue lines represent the sheet resistance (a), carrier concentration (b) and mobility (c) values for the pristine sample.

**Samples annealed in N<sub>2</sub> atmosphere**

| Temperature (°C) | SHEET RESISTANCE (kOHM/SQUARE) | P CONCENTRATION (CM <sup>-3</sup> ) | CARRIER MOBILITY (cm <sup>2</sup> /(Vs)) |
|------------------|--------------------------------|-------------------------------------|------------------------------------------|
| pristine         | 52±2                           | (4,9±0,6)E17                        |                                          |
| 700              | 48±2                           | 9,3E17±3E16                         | 13,9±0,5                                 |
| 730              | 48±2                           | 8,7E17±1E16                         | 17                                       |
| 750              | 47±2                           | 8,7E17±7E16                         | 13                                       |
| 780              | 44±2                           | 9,98E17±4E16                        | 14,1±0,6                                 |
| 800              | 43±2                           | 1,03E18±1,16                        | 14,3±0,3                                 |
| 820              |                                | 1,026E18±5E15                       | 12,07±0,06                               |
| 840              | 39±2                           | 1,06E18±1E16                        | 15,6±0,2                                 |
| 860              | 37±1                           | 1,14E18±1E16                        | 14,9±0,2                                 |
| 880              | 35±3                           | 1,02E18±6E16                        | 17±1                                     |
| 900              | 34±1                           | 1,5E18±1E17                         | 17±2                                     |

**Samples annealed in N<sub>2</sub> + O<sub>2</sub> atmosphere**

| Temperature (°C) | SHEET RESISTANCE (kOHM/SQUARE) | P CONCENTRATION (CM <sup>-3</sup> ) | CARRIER MOBILITY (cm <sup>2</sup> /(Vs)) |
|------------------|--------------------------------|-------------------------------------|------------------------------------------|
| 700              | 41±1                           | 1,186E18±7E15                       | 13,0±0,2                                 |
| 730              | 41±1                           | 1,09E18±5E15                        | 14,4±0,5                                 |
| 750              | 41±2                           | 1,08±2E15                           | 13,96±0,02                               |
| 780              | 41±1                           | 1,05E18±1E16                        | 14,7±0,2                                 |
| 800              | 38±1                           | 1,11E18±1E16                        | 14,6±0,05                                |
| 820              | 38±1                           | 1,1243E18±6E14                      | 14,31±0,4                                |
| 840              | 37±1                           | 1,34E18±4E16                        | 17,3±0,6                                 |
| 860              | 33±1                           | 1,41E18±2E16                        | 13,4±0,2                                 |
| 880              | 34±1                           | 1,314E18±1E15                       | 13,926±0,006                             |
| 900              | 36±1                           | 1,23E18±1E16                        | 14,1±0,1                                 |

**Figure 2:** ToF-SIMS depth profiles showing Mg and calibrated H depth profile for pristine sample, samples annealed at 780 °C in N<sub>2</sub> and in N<sub>2</sub> + O<sub>2</sub>.

**Sample annealed at 780°C in N<sub>2</sub> atmosphere**

| Depth (nm) | H-         | GaN-    | C-         | Al-        | O-      | Mg      |
|------------|------------|---------|------------|------------|---------|---------|
| 0,68649    | 0,62732    | 0,2632  | 1,21463    | 1,50607E-4 | 3,43639 | 0,74961 |
| 2,05947    | 0,02705    | 1,01755 | 0,13226    | 1,88293E-4 | 1,79821 | 0,43735 |
| 3,43245    | 0,00158    | 1,05969 | 0,01006    | 3,76448E-5 | 0,42716 | 0,23236 |
| 4,80543    | 6,77959E-4 | 1,04335 | 0,00362    |            | 0,10474 | 0,087   |
| 6,17841    | 8,28718E-4 | 1,02234 | 0,00219    |            | 0,02966 | 0,05438 |
| 7,55139    | 9,41811E-4 | 1,00973 | 0,00155    |            | 0,01305 | 0,04059 |
| 8,92436    | 0,00158    | 1,00484 | 0,00147    |            | 0,00853 | 0,03423 |
| 10,29734   | 0,00128    | 1,02364 | 0,00139    |            | 0,00537 | 0,0317  |
| 11,67032   | 0,00219    | 1,03417 | 0,00113    | 3,76448E-5 | 0,00499 | 0,03071 |
| 13,0433    | 0,00204    | 1,02343 | 5,64949E-4 |            | 0,00404 | 0,0307  |

|          |            |         |            |            |            |         |
|----------|------------|---------|------------|------------|------------|---------|
| 14,41628 | 0,00207    | 1,00859 | 9,04111E-4 | 0          | 0,00366    | 0,03087 |
| 15,78926 | 0,00166    | 1,00716 | 7,15644E-4 | 0          | 0,00397    | 0,02991 |
| 17,16224 | 0,00128    | 0,98958 | 7,15644E-4 | 0          | 0,00302    | 0,02888 |
| 18,53522 | 0,00192    | 1,01298 | 4,5189E-4  | 0          | 0,00317    | 0,02786 |
| 19,9082  | 0,00155    | 0,99648 | 5,64915E-4 | 0          | 0,00294    | 0,02615 |
| 21,28118 | 0,00211    | 1,00017 | 3,01223E-4 | 0          | 0,0026     | 0,02449 |
| 22,65416 | 0,00166    | 0,98306 | 2,25903E-4 | 0          | 0,00204    | 0,02313 |
| 24,02714 | 0,00215    | 0,99075 | 4,1422E-4  | 0          | 0,00245    | 0,02122 |
| 25,40012 | 0,00166    | 0,98081 | 5,64915E-4 | 0          | 0,0017     | 0,01983 |
| 26,77309 | 0,00147    | 0,99365 | 3,01223E-4 | 0          | 0,00185    | 0,01944 |
| 28,14607 | 0,00128    | 0,96993 | 3,01223E-4 | 0          | 0,00173    | 0,01874 |
| 29,51905 | 0,00222    | 0,99918 | 3,76553E-4 | 0          | 0,00139    | 0,01913 |
| 30,89203 | 0,00204    | 1,00687 | 2,63562E-4 | 0          | 0,00185    | 0,01913 |
| 32,26501 | 0,00196    | 0,9941  | 4,5189E-4  | 0          | 0,00147    | 0,01901 |
| 33,63799 | 0,00147    | 0,99493 | 3,76553E-4 | 0          | 0,00155    | 0,01836 |
| 35,01097 | 0,00192    | 0,99048 | 2,63562E-4 | 0          | 0,00155    | 0,01834 |
| 36,38395 | 0,00185    | 0,9972  | 3,38886E-4 | 0          | 0,00162    | 0,01798 |
| 37,75693 | 0,00173    | 0,99071 | 2,25903E-4 | 0          | 0,00173    | 0,01798 |
| 39,12991 | 0,00136    | 0,99538 | 1,12941E-4 | 3,76448E-5 | 0,00181    | 0,01835 |
| 40,50289 | 0,00136    | 1,00487 | 1,50593E-4 | 0          | 0,0017     | 0,01771 |
| 41,87587 | 0,00173    | 1,00127 | 2,25903E-4 | 0          | 0,00139    | 0,01788 |
| 43,24884 | 0,00181    | 1,00108 | 7,52919E-5 | 0          | 0,00105    | 0,01772 |
| 44,62182 | 0,00215    | 0,98992 | 1,88247E-4 | 0          | 0,00136    | 0,01783 |
| 45,9948  | 0,00162    | 0,98816 | 3,01223E-4 | 0          | 0,00143    | 0,01805 |
| 47,36778 | 0,002      | 0,98436 | 7,52919E-5 | 0          | 0,00121    | 0,01817 |
| 48,74076 | 0,00132    | 0,99707 | 3,38886E-4 | 0          | 8,28718E-4 | 0,01831 |
| 50,11374 | 0,0017     | 0,98996 | 1,50593E-4 | 0          | 0,0017     | 0,01855 |
| 51,48672 | 0,00151    | 1,00203 | 7,52919E-5 | 0          | 0,00151    | 0,01868 |
| 52,8597  | 0,00121    | 0,99636 | 2,25903E-4 | 0          | 0,00143    | 0,01879 |
| 54,23268 | 0,00139    | 1,00899 | 3,38886E-4 | 0          | 0,00143    | 0,01831 |
| 55,60566 | 0,00136    | 1,01229 | 7,52919E-5 | 0          | 0,00128    | 0,01833 |
| 56,97864 | 0,00109    | 0,99618 | 3,76448E-5 | 0          | 0,00121    | 0,01868 |
| 58,35162 | 0,00132    | 0,99561 | 1,12941E-4 | 0          | 9,41811E-4 | 0,01881 |
| 59,7246  | 0,00162    | 0,9924  | 3,01223E-4 | 0          | 0,00166    | 0,01923 |
| 61,09757 | 0,00181    | 0,99842 | 2,25903E-4 | 0          | 0,00102    | 0,01901 |
| 62,47055 | 0,00105    | 0,9989  | 2,63562E-4 | 0          | 0,00121    | 0,01894 |
| 63,84353 | 0,00158    | 0,99762 | 7,52919E-5 | 0          | 0,00109    | 0,01866 |
| 65,21651 | 0,00124    | 0,9975  | 7,52919E-5 | 0          | 0,00117    | 0,01822 |
| 66,58949 | 0,00124    | 1,00449 | 1,88247E-4 | 0          | 0,0017     | 0,01803 |
| 67,96247 | 0,00113    | 0,99951 | 1,88259E-4 | 0          | 8,66414E-4 | 0,01785 |
| 69,33545 | 0,00132    | 1,01521 | 7,52919E-5 | 3,76448E-5 | 0,00109    | 0,01774 |
| 70,70843 | 0,00124    | 1,0105  | 1,12941E-4 | 0          | 0,00121    | 0,01806 |
| 72,08141 | 0,00121    | 0,99372 | 0          | 0          | 6,77959E-4 | 0,01854 |
| 73,45439 | 7,91025E-4 | 1,00783 | 1,12941E-4 | 0          | 9,79515E-4 | 0,01863 |
| 74,82737 | 0,00113    | 0,98066 | 7,52919E-5 | 0          | 8,66414E-4 | 0,01871 |
| 76,20035 | 9,79515E-4 | 1,02247 | 1,12941E-4 | 0          | 8,28718E-4 | 0,01869 |
| 77,57332 | 6,77959E-4 | 1,01012 | 7,52919E-5 | 0          | 9,04111E-4 | 0,01866 |
| 78,9463  | 0,00136    | 1,00303 | 1,12941E-4 | 0          | 0,00105    | 0,01873 |
| 80,31928 | 8,66414E-4 | 0,98567 | 1,50593E-4 | 0          | 7,91025E-4 | 0,01888 |

|           |            |         |            |            |            |         |
|-----------|------------|---------|------------|------------|------------|---------|
| 81,69226  | 9,41811E-4 | 0,98726 | 1,12941E-4 | 0          | 8,66467E-4 | 0,01902 |
| 83,06524  | 0,00117    | 1,00188 | 7,52919E-5 | 0          | 9,04111E-4 | 0,0187  |
| 84,43856  | 9,79515E-4 | 0,98779 | 3,76448E-5 | 0          | 0,00102    | 0,01839 |
| 85,8112   | 7,91025E-4 | 0,9986  | 1,50593E-4 | 0          | 0,00102    | 0,01818 |
| 87,18384  | 7,53333E-4 | 1,01697 | 1,12941E-4 | 3,76448E-5 | 7,53333E-4 | 0,01816 |
| 88,55733  | 5,64915E-4 | 1,01268 | 7,52919E-5 | 7,52919E-5 | 0,00109    | 0,01794 |
| 89,92997  | 7,91025E-4 | 0,98846 | 7,52919E-5 | 0,00117    | 7,91025E-4 | 0,01789 |
| 91,30345  | 5,64915E-4 | 0,98678 | 0          | 0,00257    | 0,00128    | 0,01774 |
| 92,6761   | 7,91025E-4 | 0,97132 | 1,50593E-4 | 0,00514    | 9,04167E-4 | 0,01782 |
| 94,04874  | 5,27237E-4 | 0,95957 | 3,76448E-5 | 0,00887    | 0,00105    | 0,0182  |
| 95,42222  | 6,02592E-4 | 0,94649 | 3,76448E-5 | 0,01205    | 0,00109    | 0,01867 |
| 96,79487  | 4,5189E-4  | 0,92169 | 1,50593E-4 | 0,01733    | 9,41811E-4 | 0,01871 |
| 98,16835  | 4,1422E-4  | 0,8777  | 7,52919E-5 | 0,02658    | 0,00102    | 0,01872 |
| 99,54099  | 5,27237E-4 | 0,86529 | 2,63562E-4 | 0,03766    | 0,00128    | 0,01869 |
| 100,91364 | 3,01223E-4 | 0,85028 | 2,25903E-4 | 0,04835    | 0,00177    | 0,01789 |
| 102,28712 | 1,50593E-4 | 0,8283  | 7,53013E-5 | 0,06053    | 0,00124    | 0,01788 |
| 103,65976 | 6,40274E-4 | 0,79353 | 1,12941E-4 | 0,06911    | 0,00155    | 0,01776 |
| 105,03324 | 1,50602E-4 | 0,75942 | 2,25917E-4 | 0,07501    | 0,00196    | 0,01768 |
| 106,40589 | 3,38886E-4 | 0,74464 | 1,50593E-4 | 0,09056    | 0,00192    | 0,01819 |
| 107,77853 | 3,38886E-4 | 0,72881 | 1,12941E-4 | 0,10282    | 0,00177    | 0,01892 |
| 109,15201 | 2,63562E-4 | 0,70215 | 1,50593E-4 | 0,10776    | 0,002      | 0,0187  |
| 110,52466 | 2,63562E-4 | 0,69766 | 2,25903E-4 | 0,11474    | 0,00196    | 0,01848 |
| 111,89814 | 4,1422E-4  | 0,69089 | 1,88247E-4 | 0,12215    | 0,00257    | 0,01841 |
| 113,27078 | 3,38886E-4 | 0,68511 | 3,76448E-5 | 0,12751    | 0,00298    | 0,01809 |
| 114,64343 | 1,88247E-4 | 0,67682 | 2,25903E-4 | 0,12776    | 0,00211    | 0,01816 |
| 116,01691 | 3,38886E-4 | 0,69293 | 1,50593E-4 | 0,12956    | 0,002      | 0,01803 |
| 117,38955 | 2,63562E-4 | 0,68454 | 7,52919E-5 | 0,12398    | 0,00222    | 0,01754 |
| 118,76304 | 2,25903E-4 | 0,68056 | 2,63562E-4 | 0,1243     | 0,00238    | 0,01721 |
| 120,13568 | 1,88247E-4 | 0,70262 | 7,52964E-5 | 0,12156    | 0,00275    | 0,017   |
| 121,50832 | 2,25903E-4 | 0,71206 | 1,12941E-4 | 0,1101     | 0,00219    | 0,01741 |
| 122,88181 | 2,63562E-4 | 0,72791 | 1,50593E-4 | 0,10531    | 0,00166    | 0,01797 |
| 124,25445 | 1,12941E-4 | 0,74409 | 1,12941E-4 | 0,09353    | 0,00207    | 0,01813 |
| 125,62793 | 4,1422E-4  | 0,76118 | 1,12941E-4 | 0,08704    | 0,00204    | 0,01823 |
| 127,00058 | 3,01223E-4 | 0,79781 | 1,50593E-4 | 0,07353    | 0,00204    | 0,01822 |
| 128,37322 | 2,63562E-4 | 0,7948  | 1,12941E-4 | 0,06457    | 0,00192    | 0,01795 |
| 129,7467  | 7,52919E-5 | 0,83494 | 7,52919E-5 | 0,05609    | 0,00192    | 0,01783 |
| 131,11935 | 7,52964E-5 | 0,8634  | 3,76448E-5 | 0,04819    | 0,00143    | 0,01827 |
| 132,49283 | 1,12941E-4 | 0,84867 | 7,52919E-5 | 0,03793    | 0,0017     | 0,01819 |
| 133,86547 | 2,63562E-4 | 0,88052 | 0          | 0,03358    | 0,00189    | 0,01811 |
| 135,23812 | 1,88259E-4 | 0,88985 | 7,52919E-5 | 0,02673    | 0,00121    | 0,01786 |
| 136,6116  | 7,52919E-5 | 0,9265  | 1,50593E-4 | 0,02083    | 0,00102    | 0,01786 |
| 137,98424 | 2,25903E-4 | 0,94393 | 7,52919E-5 | 0,01637    | 0,00151    | 0,01754 |
| 139,35772 | 3,76448E-5 | 0,9432  | 7,52919E-5 | 0,01297    | 0,00105    | 0,01761 |
| 140,73037 | 3,76448E-5 | 0,94372 | 7,52919E-5 | 0,01063    | 0,00136    | 0,01763 |
| 142,10301 | 7,52919E-5 | 0,98716 | 0          | 0,00697    | 9,79515E-4 | 0,01705 |
| 143,47649 | 1,12941E-4 | 0,96092 | 3,76448E-5 | 0,00544    | 8,66414E-4 | 0,01729 |
| 144,84914 | 1,12941E-4 | 0,97274 | 7,52919E-5 | 0,00461    | 0,00102    | 0,0171  |
| 146,22262 | 0          | 0,98884 | 1,12941E-4 | 0,00302    | 0,00105    | 0,01755 |
| 147,59526 | 3,76448E-5 | 0,9757  | 3,76448E-5 | 0,00143    | 7,53333E-4 | 0,01736 |

|           |            |         |            |            |            |         |
|-----------|------------|---------|------------|------------|------------|---------|
| 148,96791 | 1,88247E-4 | 0,99327 | 1,12941E-4 | 0,00136    | 6,40274E-4 | 0,0171  |
| 150,34139 | 1,50593E-4 | 0,98205 | 7,52919E-5 | 8,28718E-4 | 9,04111E-4 | 0,01734 |
| 151,71403 | 1,12941E-4 | 0,98195 | 3,76448E-5 | 7,15644E-4 | 7,53333E-4 | 0,01681 |
| 153,08752 | 1,12941E-4 | 0,99161 | 7,52919E-5 | 3,01223E-4 | 9,04111E-4 | 0,01708 |
| 154,46016 | 7,52919E-5 | 0,99876 | 1,88247E-4 | 2,63562E-4 | 0,00102    | 0,0168  |
| 155,8328  | 7,52919E-5 | 0,98381 | 3,76448E-5 | 1,88247E-4 | 9,04111E-4 | 0,01638 |
| 157,20629 | 7,52919E-5 | 0,99429 | 3,76448E-5 | 7,52919E-5 | 0,00109    | 0,01656 |
| 158,57893 | 1,12946E-4 | 0,98044 | 3,76448E-5 | 7,52919E-5 | 7,53378E-4 | 0,01627 |
| 159,95241 | 3,76448E-5 | 0,98188 | 3,76448E-5 | 7,52919E-5 | 6,78E-4    | 0,01646 |
| 161,32506 | 7,52919E-5 | 0,98809 | 7,52919E-5 | 1,12941E-4 | 9,41811E-4 | 0,01667 |
| 162,6977  | 1,50593E-4 | 1,0068  | 0          | 3,76448E-5 | 9,04111E-4 | 0,01643 |
| 164,07118 | 1,50593E-4 | 1,00783 | 7,52919E-5 | 7,52919E-5 | 7,53333E-4 | 0,01685 |
| 165,44383 | 7,52919E-5 | 0,97255 | 7,52919E-5 | 0          | 0,00113    | 0,01669 |
| 166,81731 | 1,12941E-4 | 0,99902 | 0          | 0          | 8,28718E-4 | 0,01647 |
| 168,18995 | 7,52919E-5 | 0,99633 | 0          | 1,50593E-4 | 9,41867E-4 | 0,01656 |
| 169,5626  | 7,52919E-5 | 0,99345 | 0          | 3,76448E-5 | 7,15644E-4 | 0,01578 |
| 170,93608 | 7,52919E-5 | 0,97033 | 3,76448E-5 | 0          | 8,66414E-4 | 0,01554 |
| 172,30872 | 0          | 0,9888  | 3,76448E-5 | 7,52919E-5 | 7,53333E-4 | 0,01544 |
| 173,6822  | 2,25903E-4 | 0,98084 | 7,52919E-5 | 7,52919E-5 | 6,77959E-4 | 0,01545 |
| 175,05485 | 1,50593E-4 | 0,98725 | 0          | 7,52919E-5 | 7,91025E-4 | 0,01578 |
| 176,42749 | 7,52919E-5 | 0,98044 | 3,76448E-5 | 7,52919E-5 | 9,04111E-4 | 0,01579 |
| 177,80097 | 7,52919E-5 | 0,9924  | 0          | 0          | 9,0422E-4  | 0,01541 |
| 179,17362 | 1,12941E-4 | 0,98455 | 1,12941E-4 | 7,52919E-5 | 7,53333E-4 | 0,01496 |
| 180,5471  | 7,52919E-5 | 0,99757 | 1,88247E-4 | 1,12941E-4 | 9,04111E-4 | 0,01488 |
| 181,91974 | 3,76448E-5 | 0,9909  | 1,50593E-4 | 0          | 9,41811E-4 | 0,01452 |
| 183,29239 | 3,76448E-5 | 0,9944  | 1,12941E-4 | 0          | 9,41811E-4 | 0,01473 |
| 184,66587 | 7,52919E-5 | 0,99105 | 0          | 0          | 6,77959E-4 | 0,01471 |
| 186,03851 | 3,76471E-5 | 0,98029 | 7,52919E-5 | 3,76448E-5 | 7,53333E-4 | 0,01437 |
| 187,412   | 3,76448E-5 | 0,98456 | 0          | 0          | 9,04111E-4 | 0,01454 |
| 188,78464 | 1,50593E-4 | 0,99854 | 0          | 3,76448E-5 | 9,79515E-4 | 0,01475 |
| 190,15728 | 0          | 1,00292 | 3,76448E-5 | 0          | 9,79515E-4 | 0,01474 |
| 191,53077 | 1,12941E-4 | 0,98675 | 3,76448E-5 | 3,76448E-5 | 6,02592E-4 | 0,01455 |
| 192,90341 | 3,76448E-5 | 0,99499 | 0          | 0          | 0,00102    | 0,01458 |
| 194,27689 | 1,50593E-4 | 1,01337 | 1,12941E-4 | 0          | 9,04111E-4 | 0,01426 |
| 195,64954 | 1,88247E-4 | 1,00775 | 0          | 0          | 7,15644E-4 | 0,01402 |
| 197,02218 | 1,50593E-4 | 1,01244 | 0          | 3,76448E-5 | 0,00105    | 0,01418 |
| 198,39566 | 0          | 0,98955 | 7,52919E-5 | 7,52919E-5 | 6,40274E-4 | 0,01397 |
| 199,76831 | 3,76448E-5 | 1,01057 | 3,76448E-5 | 3,76448E-5 | 0,00117    | 0,01417 |
| 201,14179 | 7,52919E-5 | 0,99898 | 0          | 3,76448E-5 | 7,91025E-4 | 0,01401 |
| 202,51443 | 1,50593E-4 | 0,98222 | 3,76448E-5 | 0          | 6,77959E-4 | 0,01405 |
| 203,88708 | 3,76448E-5 | 0,98136 | 3,76448E-5 | 0          | 0,00113    | 0,01382 |
| 205,26056 | 3,76448E-5 | 0,98381 | 7,52919E-5 | 0          | 9,41867E-4 | 0,01342 |
| 206,6332  | 7,52919E-5 | 0,99557 | 7,52919E-5 | 0          | 9,41811E-4 | 0,01347 |
| 208,00668 | 2,25903E-4 | 0,99666 | 7,52919E-5 | 0          | 3,38886E-4 | 0,01329 |
| 209,37933 | 1,50593E-4 | 0,99018 | 7,52919E-5 | 7,52964E-5 | 7,91025E-4 | 0,01309 |
| 210,75197 | 0          | 0,98187 | 0          | 0          | 7,91025E-4 | 0,01285 |
| 212,12545 | 7,52919E-5 | 0,98637 | 0          | 3,76448E-5 | 0,00109    | 0,0131  |
| 213,4981  | 1,12941E-4 | 0,99974 | 7,52919E-5 | 0          | 6,77959E-4 | 0,01303 |
| 214,87158 | 0          | 0,9941  | 7,52919E-5 | 0          | 7,91025E-4 | 0,01318 |

|           |            |         |            |            |            |         |
|-----------|------------|---------|------------|------------|------------|---------|
| 216,24422 | 3,76448E-5 | 1,00443 | 0          | 3,76448E-5 | 0,00121    | 0,0132  |
| 217,61687 | 1,88247E-4 | 0,98783 | 0          | 3,76448E-5 | 7,91025E-4 | 0,01286 |
| 218,99035 | 7,52919E-5 | 1,00265 | 3,76448E-5 | 0          | 7,53333E-4 | 0,01256 |
| 220,36299 | 7,52919E-5 | 0,98103 | 3,76448E-5 | 0          | 9,04111E-4 | 0,01263 |
| 221,73648 | 3,76471E-5 | 0,99199 | 0          | 3,76448E-5 | 9,04111E-4 | 0,01266 |
| 223,10912 | 1,12941E-4 | 0,98843 | 3,76448E-5 | 7,52964E-5 | 7,15644E-4 | 0,01249 |
| 224,48176 | 0          | 1,00492 | 7,52919E-5 | 3,76448E-5 | 7,15644E-4 | 0,01247 |
| 225,85525 | 7,52919E-5 | 1,01482 | 1,50593E-4 | 3,76448E-5 | 0,00128    | 0,01236 |
| 227,22789 | 1,50593E-4 | 0,99443 | 3,76448E-5 | 3,76448E-5 | 9,41867E-4 | 0,01228 |
| 228,60137 | 3,76448E-5 | 0,99425 | 7,52919E-5 | 3,76448E-5 | 8,28718E-4 | 0,01176 |
| 229,97402 | 1,50593E-4 | 0,99278 | 3,76448E-5 | 0          | 8,66414E-4 | 0,01157 |
| 231,34666 | 3,76448E-5 | 0,98899 | 7,52919E-5 | 0          | 6,02592E-4 | 0,0113  |
| 232,72014 | 1,50593E-4 | 0,99274 | 3,76448E-5 | 0          | 8,28718E-4 | 0,01087 |
| 234,09279 | 7,52919E-5 | 0,98377 | 7,52919E-5 | 0          | 6,40274E-4 | 0,01108 |
| 235,46627 | 1,12941E-4 | 1,00934 | 0          | 0          | 8,66414E-4 | 0,01142 |
| 236,83891 | 2,25903E-4 | 0,9961  | 1,12941E-4 | 3,76448E-5 | 8,28718E-4 | 0,01151 |
| 238,21156 | 1,50593E-4 | 1,00093 | 3,76448E-5 | 0          | 9,04111E-4 | 0,01185 |
| 239,58504 | 1,50593E-4 | 0,9933  | 7,52919E-5 | 3,76448E-5 | 0,00102    | 0,01157 |
| 240,95768 | 7,52919E-5 | 1,00568 | 3,76448E-5 | 0          | 9,79515E-4 | 0,01098 |
| 242,33116 | 3,76448E-5 | 1,00089 | 3,76448E-5 | 0          | 8,66414E-4 | 0,01063 |
| 243,70381 | 7,52919E-5 | 0,99236 | 1,12941E-4 | 0          | 0,00113    | 0,01042 |
| 245,07645 | 7,52919E-5 | 0,99553 | 3,76448E-5 | 0          | 6,40274E-4 | 0,0104  |
| 246,44993 | 1,50593E-4 | 1,00084 | 0          | 0          | 9,41811E-4 | 0,01023 |
| 247,82258 | 1,12941E-4 | 0,97346 | 3,76448E-5 | 3,76448E-5 | 6,77959E-4 | 0,01023 |
| 249,19606 | 7,52919E-5 | 1,00066 | 3,76448E-5 | 3,76448E-5 | 6,40274E-4 | 0,0098  |
| 250,5687  | 3,76448E-5 | 0,98676 | 7,52919E-5 | 0          | 7,91074E-4 | 0,00967 |
| 251,94135 | 0          | 0,98821 | 0          | 3,76448E-5 | 7,15644E-4 | 0,00967 |

### Sample annealed at 780°C in N<sub>2</sub> + O<sub>2</sub> atmosphere

| Depth (nm) | H-         | GaN-    | C-         | Al-        | O-      | Mg      |
|------------|------------|---------|------------|------------|---------|---------|
| 0,66191    | 0,47004    | 0,52428 | 0,10552    | 8,40124E-5 | 3,96348 | 0,73404 |
| 1,98574    | 0,02163    | 1,34197 | 0,00616    | 4,20049E-5 | 3,8451  | 0,4643  |
| 3,30957    | 0,00118    | 1,12435 | 0,00101    | 4,20075E-5 | 1,17235 | 0,27665 |
| 4,6334     | 2,94089E-4 | 1,05555 | 4,20167E-4 | 8,40124E-5 | 0,29281 | 0,13322 |
| 5,95722    | 1,68035E-4 | 1,01633 | 1,26022E-4 | 0          | 0,0855  | 0,0811  |
| 7,28105    | 1,68035E-4 | 1,00937 | 1,26022E-4 | 0          | 0,0376  | 0,05814 |
| 8,60488    | 1,26022E-4 | 1,01161 | 2,1005E-4  | 0          | 0,02394 | 0,04579 |
| 9,9287     | 1,68035E-4 | 1,00924 | 1,68035E-4 | 0          | 0,01869 | 0,04062 |
| 11,25253   | 4,20049E-5 | 0,993   | 8,40124E-5 | 0          | 0,01538 | 0,03811 |
| 12,57636   | 4,20049E-5 | 1,01228 | 8,40124E-5 | 0          | 0,01323 | 0,03748 |
| 13,90019   | 1,68035E-4 | 0,99229 | 4,20049E-5 | 0          | 0,0108  | 0,03724 |
| 15,22401   | 8,40124E-5 | 1,00995 | 0          | 0          | 0,00986 | 0,03674 |
| 16,54784   | 1,68035E-4 | 0,99358 | 4,20049E-5 | 0          | 0,00909 | 0,03508 |
| 17,87167   | 2,1005E-4  | 1,0096  | 1,26022E-4 | 0          | 0,00786 | 0,03294 |
| 19,19549   | 2,94089E-4 | 1,01491 | 8,40124E-5 | 0          | 0,00608 | 0,03079 |
| 20,51932   | 8,40124E-5 | 1,0184  | 8,40124E-5 | 0          | 0,00663 | 0,02806 |
| 21,84315   | 2,94089E-4 | 1,02812 | 0          | 0          | 0,00608 | 0,02598 |
| 23,16698   | 1,68035E-4 | 1,01583 | 0          | 0          | 0,00574 | 0,02392 |
| 24,4908    | 2,1005E-4  | 0,99309 | 4,20049E-5 | 0          | 0,00574 | 0,02266 |
| 25,81463   | 2,1005E-4  | 1,01404 | 0          | 0          | 0,0051  | 0,02176 |

|          |            |         |            |            |         |         |
|----------|------------|---------|------------|------------|---------|---------|
| 27,13846 | 2,1005E-4  | 1,00686 | 0          | 0          | 0,00442 | 0,02109 |
| 28,46228 | 2,1005E-4  | 1,01937 | 1,26022E-4 | 0          | 0,00447 | 0,02052 |
| 29,78611 | 4,20049E-5 | 0,99234 | 8,40124E-5 | 0          | 0,00481 | 0,02039 |
| 31,10994 | 2,1005E-4  | 1,00897 | 1,26022E-4 | 0          | 0,00379 | 0,02043 |
| 32,43377 | 0          | 0,991   | 2,52068E-4 | 0          | 0,00379 | 0,02029 |
| 33,75759 | 4,20049E-5 | 0,9795  | 4,20049E-5 | 0          | 0,00341 | 0,02023 |
| 35,08142 | 1,26022E-4 | 1,00989 | 0          | 0          | 0,00324 | 0,02011 |
| 36,40525 | 4,20167E-4 | 1,00974 | 8,40124E-5 | 0          | 0,00282 | 0,02014 |
| 37,72908 | 2,52068E-4 | 1,0004  | 0          | 0          | 0,0035  | 0,02003 |
| 39,0529  | 2,52068E-4 | 1,00475 | 4,20049E-5 | 0          | 0,00274 | 0,01993 |
| 40,37673 | 2,1005E-4  | 1,00308 | 4,20049E-5 | 0          | 0,00286 | 0,01994 |
| 41,70056 | 1,26022E-4 | 1,00201 | 4,20049E-5 | 0          | 0,00236 | 0,02001 |
| 43,02438 | 8,40124E-5 | 1,00615 | 4,20049E-5 | 0          | 0,0024  | 0,02051 |
| 44,34821 | 1,68035E-4 | 0,99253 | 0          | 0          | 0,0024  | 0,02198 |
| 45,67204 | 8,40124E-5 | 1,00797 | 0          | 0          | 0,00299 | 0,02204 |
| 46,99587 | 4,20049E-5 | 0,99405 | 4,20075E-5 | 0          | 0,00215 | 0,02214 |
| 48,31969 | 2,94089E-4 | 0,99216 | 0          | 0          | 0,00198 | 0,02204 |
| 49,64352 | 1,68035E-4 | 1,00871 | 0          | 0          | 0,00227 | 0,02135 |
| 50,96735 | 0          | 1,00489 | 0          | 0          | 0,00244 | 0,02128 |
| 52,29117 | 4,20049E-5 | 1,01084 | 0          | 0          | 0,00219 | 0,02143 |
| 53,615   | 0          | 1,00042 | 0          | 0          | 0,00168 | 0,02126 |
| 54,93883 | 8,40124E-5 | 1,00358 | 0          | 0          | 0,00185 | 0,02101 |
| 56,26266 | 1,26022E-4 | 1,02694 | 8,40124E-5 | 0          | 0,00215 | 0,02047 |
| 57,58648 | 2,52068E-4 | 1,00416 | 0          | 0          | 0,00274 | 0,02062 |
| 58,91031 | 8,40124E-5 | 1,02732 | 4,20049E-5 | 0          | 0,00177 | 0,02077 |
| 60,23414 | 4,20049E-5 | 1,01271 | 4,20049E-5 | 0          | 0,00223 | 0,02144 |
| 61,55796 | 1,68035E-4 | 1,00688 | 4,20049E-5 | 0          | 0,00185 | 0,02203 |
| 62,88179 | 8,40124E-5 | 1,00792 | 0          | 0          | 0,0021  | 0,02199 |
| 64,20562 | 1,26022E-4 | 0,99412 | 4,20049E-5 | 0          | 0,0013  | 0,02225 |
| 65,52945 | 4,20049E-5 | 1,00038 | 0          | 0          | 0,0016  | 0,02159 |
| 66,85327 | 2,52068E-4 | 0,99398 | 0          | 0          | 0,00151 | 0,02161 |
| 68,1771  | 8,40124E-5 | 0,99198 | 0          | 0          | 0,00143 | 0,02146 |
| 69,50093 | 1,68035E-4 | 0,9854  | 4,20049E-5 | 0          | 0,00135 | 0,02159 |
| 70,82476 | 1,26022E-4 | 0,99216 | 4,20049E-5 | 0          | 0,00248 | 0,02158 |
| 72,14858 | 1,26022E-4 | 0,98699 | 0          | 0          | 0,00198 | 0,02169 |
| 73,47241 | 1,26022E-4 | 1,01228 | 0          | 0          | 0,00135 | 0,02146 |
| 74,79624 | 8,40124E-5 | 0,99635 | 0          | 4,20049E-5 | 0,00126 | 0,02111 |
| 76,12006 | 8,40124E-5 | 0,98981 | 0          | 0          | 0,0016  | 0,0209  |
| 77,44389 | 4,20049E-5 | 0,99653 | 0          | 4,20049E-5 | 0,00177 | 0,02033 |
| 78,76772 | 1,68035E-4 | 0,99427 | 4,20049E-5 | 0          | 0,00126 | 0,02064 |
| 80,09155 | 0          | 0,99021 | 4,20049E-5 | 1,26022E-4 | 0,00122 | 0,02075 |
| 81,4157  | 2,1005E-4  | 1,00411 | 0          | 7,14432E-4 | 0,00135 | 0,02159 |
| 82,7392  | 1,26022E-4 | 0,99309 | 0          | 0,00185    | 0,00172 | 0,02175 |
| 84,0627  | 4,20049E-5 | 0,97549 | 0          | 0,00413    | 0,00147 | 0,02187 |
| 85,38702 | 1,26022E-4 | 0,98512 | 0          | 0,00586    | 0,00139 | 0,02191 |
| 86,71052 | 1,68045E-4 | 0,96227 | 0          | 0,00726    | 0,00156 | 0,02137 |
| 88,03483 | 4,20049E-5 | 0,94183 | 0          | 0,01109    | 0,00139 | 0,02152 |
| 89,35834 | 8,40124E-5 | 0,93685 | 0          | 0,01405    | 0,0016  | 0,02127 |
| 90,68184 | 8,40124E-5 | 0,90289 | 0          | 0,02003    | 0,00143 | 0,02113 |

|           |            |         |            |            |            |         |
|-----------|------------|---------|------------|------------|------------|---------|
| 92,00615  | 8,40124E-5 | 0,89074 | 1,26022E-4 | 0,02716    | 0,00172    | 0,02083 |
| 93,32966  | 1,26022E-4 | 0,84981 | 4,20049E-5 | 0,03432    | 0,00172    | 0,02081 |
| 94,65397  | 2,1005E-4  | 0,8244  | 4,20049E-5 | 0,0429     | 0,00206    | 0,02071 |
| 95,97747  | 1,68045E-4 | 0,79699 | 4,20049E-5 | 0,05509    | 0,00151    | 0,02096 |
| 97,30098  | 2,52068E-4 | 0,75782 | 4,20049E-5 | 0,06647    | 0,00219    | 0,02112 |
| 98,62529  | 1,26022E-4 | 0,7497  | 4,20049E-5 | 0,07814    | 0,00227    | 0,02119 |
| 99,94879  | 4,62225E-4 | 0,73094 | 4,20049E-5 | 0,09322    | 0,0021     | 0,02133 |
| 101,2731  | 2,52068E-4 | 0,69831 | 4,20049E-5 | 0,10068    | 0,00177    | 0,02109 |
| 102,59661 | 2,52068E-4 | 0,67265 | 4,20049E-5 | 0,10981    | 0,00278    | 0,0217  |
| 103,92011 | 1,68035E-4 | 0,67682 | 4,20049E-5 | 0,11418    | 0,00278    | 0,02179 |
| 105,24442 | 2,94089E-4 | 0,65014 | 4,20049E-5 | 0,11624    | 0,0024     | 0,02162 |
| 106,56793 | 2,52068E-4 | 0,64572 | 4,20049E-5 | 0,1293     | 0,00282    | 0,02167 |
| 107,89224 | 3,36111E-4 | 0,65295 | 0          | 0,1244     | 0,00307    | 0,02125 |
| 109,21574 | 3,36111E-4 | 0,6523  | 4,20075E-5 | 0,12769    | 0,00248    | 0,0212  |
| 110,53925 | 1,68035E-4 | 0,67008 | 8,40124E-5 | 0,12479    | 0,00248    | 0,02087 |
| 111,86356 | 3,36111E-4 | 0,67517 | 0          | 0,11997    | 0,00252    | 0,0209  |
| 113,18706 | 1,26022E-4 | 0,68488 | 1,26022E-4 | 0,11112    | 0,00278    | 0,02069 |
| 114,51138 | 2,52068E-4 | 0,71086 | 0          | 0,1042     | 0,00252    | 0,02074 |
| 115,83488 | 3,36111E-4 | 0,72276 | 0          | 0,09055    | 0,00198    | 0,02103 |
| 117,15838 | 2,1005E-4  | 0,75036 | 0          | 0,08442    | 0,0024     | 0,02023 |
| 118,4827  | 1,26022E-4 | 0,77703 | 0          | 0,07442    | 0,00265    | 0,02001 |
| 119,8062  | 4,20049E-5 | 0,78962 | 4,20049E-5 | 0,06452    | 0,00223    | 0,01969 |
| 121,13051 | 2,1005E-4  | 0,81674 | 4,20049E-5 | 0,0541     | 0,00168    | 0,01948 |
| 122,45402 | 2,52068E-4 | 0,82412 | 1,26022E-4 | 0,04349    | 0,00185    | 0,02014 |
| 123,77752 | 1,26022E-4 | 0,85277 | 4,20049E-5 | 0,03848    | 0,0016     | 0,02062 |
| 125,10183 | 1,68035E-4 | 0,88825 | 4,20049E-5 | 0,03066    | 0,00164    | 0,02077 |
| 126,42534 | 0          | 0,88915 | 0          | 0,02163    | 0,00168    | 0,02056 |
| 127,74965 | 2,1005E-4  | 0,91394 | 4,20049E-5 | 0,01654    | 0,00168    | 0,02046 |
| 129,07315 | 1,68035E-4 | 0,93058 | 0          | 0,01024    | 0,00114    | 0,02004 |
| 130,39666 | 1,26022E-4 | 0,9353  | 0          | 0,00752    | 0,00135    | 0,02039 |
| 131,72097 | 8,40124E-5 | 0,95454 | 0          | 0,00383    | 0,00135    | 0,02066 |
| 133,04447 | 0          | 0,94589 | 0          | 0,00295    | 0,00126    | 0,021   |
| 134,36878 | 0          | 0,96992 | 4,20049E-5 | 0,00202    | 0,00109    | 0,02081 |
| 135,69229 | 1,26022E-4 | 0,98813 | 0          | 0,00118    | 0,00118    | 0,02039 |
| 137,01579 | 1,26022E-4 | 0,99594 | 0          | 6,30383E-4 | 0,00114    | 0,02046 |
| 138,3401  | 1,26022E-4 | 0,99149 | 0          | 4,62196E-4 | 7,14478E-4 | 0,01998 |
| 139,66361 | 4,20049E-5 | 0,98487 | 8,40124E-5 | 2,94089E-4 | 8,82644E-4 | 0,01997 |
| 140,98792 | 8,40124E-5 | 0,98189 | 0          | 8,40124E-5 | 0,00101    | 0,01962 |
| 142,31142 | 8,40124E-5 | 0,98474 | 0          | 2,1005E-4  | 8,82644E-4 | 0,01935 |
| 143,63493 | 4,20049E-5 | 0,98941 | 0          | 2,1005E-4  | 0,00105    | 0,01977 |
| 144,95924 | 8,40124E-5 | 0,98299 | 0          | 4,20049E-5 | 0,00109    | 0,02012 |
| 146,28274 | 1,2603E-4  | 0,99715 | 0          | 1,26022E-4 | 6,72428E-4 | 0,02029 |
| 147,60706 | 4,20049E-5 | 0,98789 | 4,20049E-5 | 4,20049E-5 | 0,00109    | 0,02053 |
| 148,93056 | 4,20049E-5 | 0,97775 | 0          | 4,20049E-5 | 0,00122    | 0,02004 |
| 150,25406 | 4,20049E-5 | 0,99358 | 0          | 1,26022E-4 | 0,00122    | 0,0198  |
| 151,57838 | 4,20049E-5 | 0,99056 | 0          | 4,20049E-5 | 0,00114    | 0,01982 |
| 152,90188 | 4,20049E-5 | 0,99282 | 0          | 0          | 0,00105    | 0,01926 |
| 154,22619 | 8,40124E-5 | 0,99332 | 0          | 0          | 5,46266E-4 | 0,01898 |
| 155,5497  | 1,26022E-4 | 0,9821  | 8,40124E-5 | 1,26022E-4 | 0,00105    | 0,0188  |

|           |            |         |            |            |            |         |
|-----------|------------|---------|------------|------------|------------|---------|
| 156,8732  | 4,20049E-5 | 0,96359 | 4,20049E-5 | 4,20049E-5 | 7,98582E-4 | 0,01832 |
| 158,19751 | 1,68035E-4 | 0,99604 | 0          | 2,1005E-4  | 5,88303E-4 | 0,01872 |
| 159,52102 | 8,40124E-5 | 0,97884 | 0          | 4,20049E-5 | 7,98532E-4 | 0,0184  |
| 160,84533 | 1,26022E-4 | 0,99876 | 0          | 4,20049E-5 | 9,24702E-4 | 0,01836 |
| 162,16883 | 1,68035E-4 | 0,9858  | 0          | 0          | 0,00109    | 0,0181  |
| 163,49234 | 0          | 0,99854 | 0          | 0          | 9,24702E-4 | 0,01772 |
| 164,81665 | 8,40124E-5 | 0,99734 | 0          | 4,20049E-5 | 7,98532E-4 | 0,01789 |
| 166,14015 | 8,40124E-5 | 0,99123 | 0          | 4,20049E-5 | 7,56482E-4 | 0,01792 |
| 167,46446 | 0          | 0,98325 | 0          | 0          | 0,00122    | 0,01846 |
| 168,78797 | 8,40124E-5 | 0,98917 | 4,20049E-5 | 4,20049E-5 | 9,24702E-4 | 0,0182  |
| 170,11147 | 0          | 0,97671 | 0          | 1,26022E-4 | 8,40586E-4 | 0,018   |
| 171,43578 | 4,20049E-5 | 0,97139 | 0          | 4,20075E-5 | 7,56524E-4 | 0,01764 |
| 172,75929 | 8,40124E-5 | 0,96521 | 8,40124E-5 | 1,2603E-4  | 9,24702E-4 | 0,01742 |
| 174,0836  | 8,40124E-5 | 0,99715 | 0          | 0          | 9,24702E-4 | 0,01717 |
| 175,4071  | 4,20049E-5 | 0,97463 | 0          | 0          | 9,66765E-4 | 0,01744 |
| 176,73061 | 8,40124E-5 | 0,98544 | 0          | 0          | 0,00126    | 0,01761 |
| 178,05492 | 1,26022E-4 | 0,97763 | 0          | 4,20049E-5 | 7,98532E-4 | 0,01731 |
| 179,37842 | 4,20049E-5 | 0,99203 | 4,20049E-5 | 4,20049E-5 | 6,72386E-4 | 0,01745 |
| 180,70274 | 0          | 0,97692 | 0          | 1,26022E-4 | 7,56482E-4 | 0,01693 |
| 182,02624 | 4,20075E-5 | 0,98937 | 0          | 0          | 9,24702E-4 | 0,01632 |
| 183,34974 | 1,26022E-4 | 0,99185 | 0          | 0          | 7,14432E-4 | 0,01644 |
| 184,67406 | 4,20049E-5 | 0,99119 | 4,20049E-5 | 0          | 0,0013     | 0,01628 |
| 185,99756 | 4,20075E-5 | 0,98806 | 0          | 0          | 7,56482E-4 | 0,0166  |
| 187,32187 | 0          | 0,97063 | 0          | 0          | 7,56482E-4 | 0,01678 |
| 188,64538 | 1,26022E-4 | 0,96368 | 0          | 0          | 7,98532E-4 | 0,01655 |
| 189,96888 | 4,20049E-5 | 0,99376 | 8,40124E-5 | 0          | 0,00109    | 0,01643 |
| 191,29319 | 1,68035E-4 | 0,98562 | 0          | 0          | 6,72386E-4 | 0,01636 |
| 192,6167  | 4,20049E-5 | 0,99407 | 0          | 4,20049E-5 | 0,00101    | 0,01621 |
| 193,94101 | 0          | 0,97814 | 4,20049E-5 | 0          | 5,46266E-4 | 0,01638 |
| 195,26451 | 4,20049E-5 | 0,98507 | 0          | 0          | 7,98532E-4 | 0,01646 |
| 196,58802 | 1,68035E-4 | 0,99007 | 0          | 0          | 5,46266E-4 | 0,01638 |
| 197,91233 | 4,20049E-5 | 0,98177 | 4,20049E-5 | 0          | 9,66765E-4 | 0,01699 |
| 199,23583 | 4,20049E-5 | 0,98561 | 0          | 0          | 7,98532E-4 | 0,01643 |
| 200,56014 | 8,40124E-5 | 0,99003 | 0          | 8,40124E-5 | 7,98532E-4 | 0,01612 |
| 201,88365 | 4,20049E-5 | 0,98866 | 0          | 4,20049E-5 | 9,24757E-4 | 0,01602 |
| 203,20715 | 8,40124E-5 | 0,98299 | 0          | 0          | 9,24757E-4 | 0,01569 |
| 204,53146 | 8,40124E-5 | 0,98285 | 0          | 0          | 8,82644E-4 | 0,01591 |
| 205,85497 | 1,26022E-4 | 0,99234 | 0          | 8,40124E-5 | 6,72386E-4 | 0,01608 |
| 207,17928 | 4,20049E-5 | 0,97705 | 0          | 4,20049E-5 | 0,00105    | 0,01561 |
| 208,50278 | 8,40124E-5 | 0,98681 | 0          | 0          | 8,82699E-4 | 0,0151  |
| 209,82629 | 4,20049E-5 | 0,99194 | 4,20049E-5 | 4,20049E-5 | 0,00109    | 0,0148  |
| 211,1506  | 8,40124E-5 | 0,97236 | 0          | 1,68035E-4 | 5,04258E-4 | 0,01494 |
| 212,4741  | 1,2603E-4  | 0,97766 | 0          | 0          | 6,72386E-4 | 0,01505 |
| 213,79842 | 8,40124E-5 | 0,98597 | 0          | 0          | 6,30345E-4 | 0,01494 |
| 215,12192 | 1,26022E-4 | 0,98474 | 4,20049E-5 | 0          | 4,20167E-4 | 0,01497 |
| 216,44542 | 4,20049E-5 | 0,98791 | 0          | 4,20049E-5 | 9,66765E-4 | 0,01467 |
| 217,76974 | 1,26022E-4 | 0,96419 | 0          | 0          | 6,30345E-4 | 0,01431 |
| 219,09324 | 0          | 0,97467 | 0          | 0          | 7,98532E-4 | 0,01441 |
| 220,41755 | 0          | 0,97605 | 0          | 0          | 7,98532E-4 | 0,01398 |

|           |            |         |   |            |            |         |
|-----------|------------|---------|---|------------|------------|---------|
| 221,74106 | 4,20049E-5 | 0,97359 | 0 | 0          | 7,14432E-4 | 0,01408 |
| 223,06456 | 8,40124E-5 | 0,97307 | 0 | 0          | 5,04229E-4 | 0,01418 |
| 224,38887 | 4,20049E-5 | 0,96395 | 0 | 4,20075E-5 | 4,62196E-4 | 0,01394 |

### Pristine sample

**Figure 3:** H dose of p-GaN layer as a function of annealing temperature for two different atmosphere conditions N<sub>2</sub> and N<sub>2</sub> + O<sub>2</sub>. The dashed blue line represents the H dose of the pristine sample. H dose as a function of sheet resistance for two different annealing atmospheres N<sub>2</sub> and N<sub>2</sub> + O<sub>2</sub>. In blue, the value for the pristine sample. In the inset, oxygen ToF-SIMS depth profile for each annealing temperature in N<sub>2</sub>+O<sub>2</sub> atmosphere.

| Temperature annealing (°C) | O concentration       | Sheet resistance | concentration  | Error concentration | H concentration | concentration                  | Error concentration            |
|----------------------------|-----------------------|------------------|----------------|---------------------|-----------------|--------------------------------|--------------------------------|
|                            | Atoms/cm <sup>3</sup> | ohm/square       | N <sub>2</sub> | N <sub>2</sub>      | N <sub>2</sub>  | N <sub>2</sub> +O <sub>2</sub> | N <sub>2</sub> +O <sub>2</sub> |
| 730                        | 0,00476               | 40765,1          | 8,65625E17     | 1,15957E17          | 1,16686E16      | 1,088E18                       | 5,19615E15                     |
| 750                        | 0,00425               | 41546,9          | 8,7062E17      | 7,41463E16          | 1,06096E16      | 1,0785E18                      | 2,12132E15                     |
| 780                        | 0,0052                | 40557,4          | 9,98099E17     | 4,46299E16          | 1,00511E16      | 1,046E18                       | 1,47986E16                     |
| 800                        | 0,00473               | 38531            | 1,034E18       | 1,45258E16          | 8,82063E15      | 1,11467E18                     | 1,22202E16                     |
| 820                        | 0,00513               | 38727,1          | 1,02791E18     | 5,08495E15          | 7,98176E15      | 1,12433E18                     | 5,7735E14                      |
| 840                        | 0,00564               | 36953,7          | 1,05767E18     | 1,09697E16          | 3,69631E15      | 1,3412E18                      | 3,87778E16                     |
| 860                        | 0,00773               | 33172,9          | 1,13567E18     | 1,06927E16          | 2,87911E15      | 1,408E18                       | 1,74356E16                     |
| 880                        | 0,01739               | 34117            | 1,02602E18     | 5,78273E16          | 2,34328E15      | 1,31433E18                     | 1,52753E15                     |
| 900                        | 0,05681               | 36011,3          | 1,04863E18     | 1,4673E17           | 2,97714E15      | 1,23467E18                     | 1,00167E16                     |

**Figure 4:** Measured sheet resistance values as a function of the temperature for pristine sample and annealed in N<sub>2</sub> + O<sub>2</sub> at 780 , 860 and 900 °C. Carrier mobility and carrier concentration as a function of the temperature for pristine (blue circles) and samples annealed in N<sub>2</sub> + O<sub>2</sub> at 780 °C and 860 °C. Mobility and carrier concentration are measured in the range of temperature between 5-300 K by Hall effect measurement. The carrier mobility values for temperature in the range of 300-600 K are obtained by fitting the mobility as a T<sup>-3/2</sup> function, as shown in the inset of panel. Hole concentration values have been calculated using sheet resistance data and mobility values.

### Pristine

| T (K) | sheet resistance (ohm/square) | hole mobility (cm <sup>2</sup> /(Vs)) | hole concentration (cm <sup>-3</sup> ) |
|-------|-------------------------------|---------------------------------------|----------------------------------------|
| 8     | --                            | 47,67142                              | 9,72415E17                             |
| 16    | 13686,4                       | 35,14899                              |                                        |
| 24    | 13987,5                       | 65,38731                              | 6,83355E17                             |
| 32    | 14327,5                       | 66,85488                              | 6,52494E17                             |

|     |         |          |            |
|-----|---------|----------|------------|
| 40  | 14711,3 | 60,8243  | 6,98477E17 |
| 48  | 15149,2 | 70,98564 | 5,81192E17 |
| 56  | 15629,3 | 68,86109 | 5,8072E17  |
| 64  | 16150   | 65,15668 | 5,93948E17 |
| 72  | 16733,1 | 61,38977 | 6,08426E17 |
| 80  | 17382,7 | 59,66879 | 6,02581E17 |
| 88  | 18088,7 | 56,86629 | 6,076E17   |
| 96  | 18832   | 54,62177 | 6,076E17   |
| 104 | 19629,9 | 52,17828 | 6,102E17   |
| 112 | 20465,4 | 49,39245 | 6,183E17   |
| 120 | 21383,7 | 46,9524  | 6,225E17   |
| 128 | 22286,8 | 44,2536  | 6,337E17   |
| 136 | 23199,8 | 41,89718 | 6,43E17    |
| 144 | 24239,9 | 40,01852 | 6,443E17   |
| 152 |         | --       | 6,537E17   |
| 160 | 26297,1 | 35,89079 | 6,622E17   |
| 168 | 27493,6 | 33,10407 | 6,867E17   |
| 176 |         | --       | 6,82252E17 |
| 184 | 29702,8 | 29,69906 | 7,085E17   |
| 192 | 30982,8 | 28,95018 | 6,968E17   |
| 200 | 32234,7 | 27,43603 | 7,067E17   |
| 204 | 32843,4 | 26,51853 | 7,176E17   |
| 208 | 33425,5 | 25,80856 | 7,245E17   |
| 212 | 34092,8 | 25,16792 | 7,284E17   |

|        |         |          |            |
|--------|---------|----------|------------|
| 216    | 34812,1 | 24,11812 | 7,444E17   |
| 220    | 35423,4 | 23,71147 | 7,441E17   |
| 224    | 36095,8 | 24,55685 | 7,051E17   |
| 228    | 36777,8 | 23,67175 | 7,179E17   |
| 232    | 37395   | 22,47944 | 7,435E17   |
| 236    | 37972,2 | 22,18548 | 7,419E17   |
| 240    | 38626,3 | 21,9906  | 7,358E17   |
| 244    | 39209,5 | 21,33585 | 7,471E17   |
| 248    | 39646,7 | 20,17952 | 7,812E17   |
| 252    | 40170,7 | 18,96697 | 8,203E17   |
| 256    | 40731,7 | 18,3347  | 8,369E17   |
| 260    | 41194,9 | 17,46292 | 8,688E17   |
| 264    | 41765,3 | 17,23235 | 8,684E17   |
| 268    | 42261,3 | 17,25061 | 8,573E17   |
| 272    | 42685,7 | 16,88022 | 8,674E17   |
| 276    | 43326,4 | 16,45269 | 8,7678E17  |
| 280    | 43783   | 15,5059  | 9,20614E17 |
| 284    | 44301,7 | 15,06592 | 9,36405E17 |
| 288    | 44845,7 | 16,29067 | 8,55501E17 |
| 292    | 45136,1 | 13,72997 | 1,00852E18 |
| 296    | 45584,7 | 15,03685 | 9,1181E17  |
| 300    | 46095,4 | 14,09349 | 9,62063E17 |
| 300,25 | 47230   | 14,88841 | 8,70391E17 |
| 301,05 | 46990   | 14,77552 | 8,81427E17 |

|        |       |          |            |
|--------|-------|----------|------------|
| 303,2  | 47110 | 14,66349 | 8,85946E17 |
| 305,6  | 47250 | 14,5523  | 8,90125E17 |
| 308,05 | 47390 | 14,44196 | 8,94331E17 |
| 310,7  | 47520 | 14,11593 | 9,12535E17 |
| 313,2  | 47650 | 14,0089  | 9,1705E17  |
| 315,8  | 47770 | 13,79726 | 9,28826E17 |
| 318,35 | 47910 | 13,69265 | 9,33243E17 |
| 320,95 | 48030 | 13,48579 | 9,45239E17 |
| 323,55 | 48180 | 13,28206 | 9,56811E17 |
| 326,15 | 48310 | 13,18135 | 9,61579E17 |
| 328,85 | 48430 | 12,98221 | 9,73959E17 |
| 331,5  | 48570 | 12,88378 | 9,78628E17 |
| 334,15 | 48700 | 12,68914 | 9,91041E17 |
| 336,8  | 48840 | 12,59293 | 9,95807E17 |
| 339,35 | 48980 | 12,40268 | 1,00825E18 |
| 349,95 | 49110 | 12,21531 | 1,02106E18 |
| 352,55 | 49240 | 12,12269 | 1,0262E18  |
| 355,25 | 49370 | 12,03077 | 1,03137E18 |
| 357,9  | 49520 | 11,93955 | 1,03616E18 |
| 360,55 | 49650 | 11,75918 | 1,04936E18 |
| 363,2  | 49790 | 11,58153 | 1,06252E18 |
| 365,85 | 49910 | 11,49371 | 1,06811E18 |
| 368,5  | 50020 | 11,32007 | 1,08216E18 |
| 371,15 | 50150 | 11,23424 | 1,08765E18 |

|        |       |          |            |
|--------|-------|----------|------------|
| 373,85 | 50280 | 11,14906 | 1,09319E18 |
| 376,45 | 50400 | 10,98063 | 1,10736E18 |
| 379,15 | 50520 | 10,89737 | 1,11322E18 |
| 381,95 | 50640 | 10,73274 | 1,12767E18 |
| 384,55 | 50740 | 10,65136 | 1,13409E18 |
| 387,25 | 50880 | 10,5706  | 1,13967E18 |
| 389,95 | 50990 | 10,49045 | 1,14595E18 |
| 392,65 | 51100 | 10,33197 | 1,16107E18 |
| 395,25 | 51200 | 10,25362 | 1,1677E18  |
| 397,95 | 51320 | 10,09872 | 1,18289E18 |
| 400,55 | 51420 | 10,02215 | 1,18966E18 |
| 403,25 | 51530 | 9,94616  | 1,19624E18 |
| 405,95 | 51630 | 9,87074  | 1,20309E18 |
| 408,55 | 51760 | 9,72162  | 1,21853E18 |
| 411,35 | 51870 | 9,64791  | 1,22529E18 |
| 413,95 | 51980 | 9,50216  | 1,2415E18  |
| 416,65 | 51990 | 9,43011  | 1,25075E18 |
| 419,35 | 52100 | 9,3586   | 1,25769E18 |
| 421,95 | 52230 | 9,28764  | 1,26421E18 |
| 424,55 | 52350 | 9,21722  | 1,271E18   |
| 427,35 | 52470 | 9,07797  | 1,2876E18  |
| 429,95 | 52610 | 9,00914  | 1,29405E18 |
| 432,75 | 52770 | 8,94083  | 1,30006E18 |
| 435,35 | 52970 | 8,87304  | 1,30513E18 |

|        |       |         |            |
|--------|-------|---------|------------|
| 438,05 | 53200 | 8,73899 | 1,31953E18 |
| 440,75 | 53450 | 8,67273 | 1,32351E18 |
| 443,45 | 53710 | 8,60697 | 1,32728E18 |
| 446,05 | 54040 | 8,54171 | 1,3294E18  |
| 448,75 | 54400 | 8,47694 | 1,33086E18 |
| 451,35 | 54770 | 8,34888 | 1,3423E18  |
| 454,05 | 55160 | 8,28557 | 1,34317E18 |
| 456,75 | 55540 | 8,22275 | 1,34433E18 |
| 459,45 | 55820 | 8,1604  | 1,34793E18 |
| 462,05 | 56110 | 8,09853 | 1,35133E18 |
| 464,75 | 56460 | 8,03712 | 1,35336E18 |
| 467,35 | 56700 | 7,97618 | 1,35803E18 |
| 470,85 | 56870 | 7,9157  | 1,36439E18 |
| 472,15 | 57010 | 7,79612 | 1,38197E18 |
| 482,75 | 58780 | 7,73701 | 1,38989E18 |
| 494,85 | 58810 | 7,67834 | 1,39619E18 |
| 497,55 | 58820 | 7,62012 | 1,40229E18 |
| 500,15 | 58850 | 7,39162 | 1,40271E18 |
| 502,75 | 58860 | 7,11561 | 1,45639E18 |
| 505,45 | 58860 | 7,06166 | 1,46728E18 |
| 508,05 | 58870 | 7,00811 | 1,47775E18 |
| 510,65 | 58910 | 6,95497 | 1,4888E18  |
| 513,35 | 58930 | 6,90224 | 1,50017E18 |
| 516,05 | 58990 | 6,8499  | 1,51138E18 |

|        |       |         |            |
|--------|-------|---------|------------|
| 518,65 | 59040 | 6,79797 | 1,52192E18 |
| 521,35 | 59090 | 6,74642 | 1,53304E18 |
| 523,95 | 59150 | 6,69527 | 1,54322E18 |
| 526,55 | 59200 | 6,6445  | 1,55373E18 |
| 529,25 | 59260 | 6,59412 | 1,56431E18 |
| 531,95 | 59200 | 6,54412 | 1,5747E18  |
| 534,55 | 59380 | 6,4945  | 1,58542E18 |
| 537,25 | 59450 | 6,44526 | 1,59596E18 |
| 539,95 | 59510 | 6,39639 | 1,60974E18 |
| 542,55 | 59570 | 6,34789 | 1,61725E18 |
| 545,25 | 59650 | 6,29975 | 1,62773E18 |
| 547,95 | 59740 | 6,25199 | 1,63855E18 |
| 550,55 | 59810 | 6,20458 | 1,64945E18 |
| 553,25 | 59900 | 6,15754 | 1,65988E18 |
| 556,05 | 60010 | 6,11085 | 1,6701E18  |
| 558,65 | 60110 | 6,06451 | 1,68094E18 |
| 561,35 | 60240 | 6,01853 | 1,6913E18  |

## 780 °C

| <b>T (K)</b> | <b>sheet resistance<br/>(ohm/square)</b> | <b>hole mobility<br/>(cm<sup>2</sup>/(Vs))</b> | <b>hole<br/>concentration<br/>(cm<sup>-3</sup>)</b> |
|--------------|------------------------------------------|------------------------------------------------|-----------------------------------------------------|
| 4,437        | 17454,6                                  | 53,36556                                       |                                                     |
| 8            | 17242,4                                  | 51,80726                                       | 6,99667E17                                          |
| 16           | 17183,5                                  | 51,98242                                       | 6,997E17                                            |

|     |         |          |          |
|-----|---------|----------|----------|
| 24  | 17100,1 | 57,064   | 6,405E17 |
| 32  | 16742,7 | 59,28172 | 6,297E17 |
| 40  | 16539,6 | 60,8504  | 6,21E17  |
| 48  | 16553,4 | 61,34296 | 6,155E17 |
| 56  | 16862,4 | 60,27763 | 6,149E17 |
| 64  | 17171,1 | 59,35807 | 6,132E17 |
| 72  | 17400,9 | 58,19456 | 6,172E17 |
| 80  | 17750,9 | 56,39834 | 6,243E17 |
| 88  | 18073,3 | 54,60508 | 6,333E17 |
| 96  | 18537,2 | 53,4157  | 6,312E17 |
| 104 | 19164,5 | 51,47969 | 6,335E17 |
| 112 | 19681,9 | 49,81968 | 6,374E17 |
| 120 | 20533,4 | 47,12527 | 6,459E17 |
| 128 | 21102   | 45,55922 | 6,501E17 |
| 136 | 21830,2 | 43,88422 | 6,524E17 |
| 144 | 22659,1 | 42,22063 | 6,533E17 |
| 152 | 23561,7 | 40,33161 | 6,577E17 |
| 160 | 24699,7 | 38,05105 | 6,65E17  |
| 164 | 25730,9 | 36,46031 | 6,662E17 |
| 168 | 26508,6 | 35,30586 | 6,678E17 |
| 172 | 27363,4 | 34,04491 | 6,709E17 |
| 176 | 27947,4 | 33,1016  | 6,756E17 |
| 180 | 28421   | 32,36794 | 6,794E17 |
| 184 | 29062,8 | 31,50938 | 6,825E17 |

|     |         |          |          |
|-----|---------|----------|----------|
| 188 | 29629,2 | 30,74039 | 6,862E17 |
| 192 | 30195,5 | 30,01515 | 6,896E17 |
| 196 | 30675,7 | 29,24    | 6,968E17 |
| 200 | 31289,3 | 28,45424 | 7,02E17  |
| 204 | 31899,6 | 27,6382  | 7,089E17 |
| 208 | 32340,3 | 26,97618 | 7,164E17 |
| 212 | 32897,4 | 26,20478 | 7,25E17  |
| 216 | 33443,1 | 25,46458 | 7,339E17 |
| 220 | 33993,7 | 24,83555 | 7,403E17 |
| 224 | 34708,3 | 24,07704 | 7,479E17 |
| 228 | 35161,1 | 23,4968  | 7,565E17 |
| 232 | 35659,7 | 22,96487 | 7,632E17 |
| 236 | 36227   | 22,30423 | 7,735E17 |
| 240 | 36622   | 21,61652 | 7,895E17 |
| 244 | 37032,2 | 21,08596 | 8,004E17 |
| 248 | 37446,1 | 20,48939 | 8,146E17 |
| 252 | 37855,4 | 20,03178 | 8,242E17 |
| 256 | 38135,2 | 19,46213 | 8,421E17 |
| 260 | 38449   | 18,74458 | 8,672E17 |
| 264 | 38780,4 | 18,17365 | 8,868E17 |
| 268 | 39017,5 | 17,59883 | 9,102E17 |
| 272 | 39143,1 | 17,16518 | 9,302E17 |
| 276 | 39290,3 | 16,697   | 9,527E17 |
| 280 | 39372,4 | 16,22617 | 9,783E17 |

|           |         |          |            |
|-----------|---------|----------|------------|
| 284       | 39417,2 | 15,69362 | 1,01035E18 |
| 288       | 39366,9 | 15,76592 | 1,007E18   |
| 292       | 39406,1 | 15,92007 | 9,96257E17 |
| 296       | 39405   | 15,81349 | 1,003E18   |
| 300       | 39395,7 | 15,44759 | 1,027E18   |
| 301,38169 | 38850   | 15,15647 | 1,07144E18 |
| 302,94385 |         | 15,04063 | 1,07919E18 |
| 304,51411 |         | 14,92567 | 1,08672E18 |
| 306,09251 | 38790   | 14,8116  | 1,09458E18 |
| 307,6791  |         | 14,69839 | 1,11018E18 |
| 309,2739  |         | 14,58605 | 1,1185E18  |
| 310,87697 | 38690   | 14,47457 | 1,13445E18 |
| 312,48836 |         | 14,36394 | 1,14324E18 |
| 314,10809 | 38600   | 14,25416 | 1,15241E18 |
| 315,73622 |         | 14,14522 | 1,16914E18 |
| 317,37279 | 38490   | 14,03711 | 1,17882E18 |
| 319,01784 |         | 13,92982 | 1,19626E18 |
| 320,67142 | 38370   | 13,82336 | 1,20617E18 |
| 322,33357 |         | 13,71771 | 1,21617E18 |
| 324,00434 | 38230   | 13,61286 |            |
| 325,68376 |         | 13,50882 | 1,2348E18  |
| 327,37189 | 38090   | 13,40557 | 1,24537E18 |
| 329,06877 |         | 13,30312 | 1,26446E18 |
| 330,77445 | 37940   | 13,20144 | 1,27529E18 |

|           |       |          |            |
|-----------|-------|----------|------------|
| 332,48897 |       | 13,10054 |            |
| 334,21237 | 37780 | 13,00042 | 1,29485E18 |
| 335,94471 |       | 12,90106 | 1,30629E18 |
| 337,68603 | 37600 | 12,80245 | 1,31784E18 |
| 339,43637 |       | 12,70461 | 1,33843E18 |
| 341,19578 | 37420 | 12,60751 | 1,35063E18 |
| 342,96432 |       | 12,51115 |            |
| 344,74202 | 37230 | 12,41553 | 1,38463E18 |
| 346,52894 |       | 12,32063 |            |
| 348,32512 | 37020 | 12,22647 | 1,39728E18 |
| 350,1306  |       | 12,13302 | 1,4199E18  |
| 351,94545 | 36800 | 12,04029 | 1,43288E18 |
| 353,76971 |       | 11,94827 |            |
| 355,60342 | 36570 | 11,85695 | 1,47023E18 |
| 357,44663 |       | 11,76633 | 1,48451E18 |
| 359,2994  | 36340 | 11,6764  | 1,49895E18 |
| 361,16177 |       | 11,58715 | 1,52369E18 |
| 363,0338  | 36100 | 11,4986  | 1,53896E18 |
| 364,91552 |       | 11,41071 | 1,55396E18 |
| 366,80701 | 35850 | 11,3235  |            |
| 368,70829 |       | 11,23696 |            |
| 370,61944 | 35600 | 11,15107 | 1,59598E18 |
| 372,54048 |       | 11,06585 | 1,61203E18 |
| 374,47149 | 35330 | 10,98127 | 1,6392E18  |

|           |       |          |            |
|-----------|-------|----------|------------|
| 376,4125  |       | 10,89734 | 1,65619E18 |
| 378,36358 | 35060 | 10,81405 | 1,67338E18 |
| 380,32477 |       | 10,7314  | 1,69029E18 |
| 382,29612 | 34770 | 10,64938 | 1,71983E18 |
| 384,27769 |       | 10,56799 | 1,73774E18 |
| 386,26954 | 34480 | 10,48722 | 1,75637E18 |
| 388,2717  |       | 10,40707 | 1,77472E18 |
| 390,28425 | 34160 | 10,32753 |            |
| 392,30723 |       | 10,24859 | 1,8258E18  |
| 394,34069 | 33850 | 10,17026 | 1,84549E18 |
| 396,38469 |       | 10,09253 | 1,86596E18 |
| 398,43929 | 33520 | 10,0154  | 1,88725E18 |
| 400,50454 |       | 9,93885  | 1,92163E18 |
| 402,58049 | 33200 | 9,86289  | 1,94364E18 |
| 404,6672  |       | 9,78751  | 1,96536E18 |
| 406,76473 | 32860 | 9,7127   | 1,98795E18 |
| 408,87313 |       | 9,63847  | 2,01145E18 |
| 410,99246 | 32500 | 9,5648   |            |
| 413,12278 |       | 9,4917   | 2,09666E18 |
| 415,26413 | 32150 | 9,41915  | 2,12165E18 |
| 417,41659 |       | 9,34716  | 2,14766E18 |
| 419,5802  | 31810 | 9,27573  | 2,17406E18 |
| 421,75503 |       | 9,20483  |            |
| 423,94113 | 31470 | 9,13448  |            |

|           |       |         |            |
|-----------|-------|---------|------------|
| 426,13857 |       | 9,06467 |            |
| 428,34739 | 31130 | 8,99538 |            |
| 430,56766 |       | 8,92663 | 2,32463E18 |
| 432,79944 | 30800 | 8,85841 | 2,35288E18 |
| 435,04279 |       | 8,7907  | 2,38154E18 |
| 437,29776 | 30450 | 8,72352 | 2,41062E18 |
| 439,56443 |       | 8,65684 | 2,43934E18 |
| 441,84284 | 30100 | 8,59068 |            |
| 444,13306 |       | 8,52502 | 2,5483E18  |
| 446,43516 | 29710 | 8,45987 | 2,57981E18 |
| 448,74919 |       | 8,39521 | 2,61266E18 |
| 451,07521 | 29320 | 8,33104 | 2,64691E18 |
| 453,41328 |       | 8,26737 | 2,68262E18 |
| 455,76348 | 28940 | 8,20418 | 2,71801E18 |
| 458,12586 |       | 8,14148 | 2,79151E18 |
| 460,50048 | 28580 | 8,07925 | 2,8287E18  |
| 462,88742 |       | 8,01751 | 2,86551E18 |
| 465,28672 | 28230 | 7,95623 | 2,90292E18 |
| 467,69846 |       | 7,89542 | 2,94093E18 |
| 470,1227  | 28000 | 7,83507 | 3,02313E18 |
| 472,55951 |       | 7,77519 | 3,09314E18 |
| 475,00895 | 27630 | 7,71577 | 2,99644E18 |
| 477,47108 | 27390 | 7,6568  |            |
| 479,94598 | 27140 | 7,59828 | 3,06248E18 |

|           |       |         |            |
|-----------|-------|---------|------------|
| 482,4337  | 26890 | 7,5402  |            |
| 484,93432 | 26630 | 7,48257 | 3,18059E18 |
| 487,4479  | 26370 | 7,42538 |            |
| 489,97451 | 26100 | 7,36863 | 3,25377E18 |
| 492,51422 | 25830 | 7,31231 | 3,30674E18 |
| 495,06709 | 25560 | 7,25643 | 3,38467E18 |
| 497,63319 | 25300 | 7,20097 |            |
| 500,2126  | 25000 | 7,14593 | 3,46479E18 |
| 502,80537 | 24700 | 7,09131 | 3,52351E18 |
| 505,41158 | 24420 | 7,03712 | 3,60629E18 |
| 508,0313  | --    | 6,98333 |            |
| 510,6646  | 23830 | 6,92996 |            |
| 513,31155 | 23570 | 6,87699 | 3,76531E18 |
| 515,97222 | 23310 | 6,82443 | 3,85807E18 |
| 518,64669 | 23080 | 6,77227 |            |
| 521,33501 | 22840 | 6,72051 | 3,92723E18 |
| 524,03727 | 22600 | 6,66915 | 4,02983E18 |
| 526,75353 | 22360 | 6,61818 |            |
| 529,48388 | 22130 | 6,5676  | 4,19949E18 |
| 532,22837 | 21900 | 6,5174  |            |
| 534,9871  | 21680 | 6,46759 |            |
| 537,76012 | 21470 | 6,41816 | 4,36911E18 |
| 540,54751 | 21260 | 6,3691  |            |
| 543,34936 | 21050 | 6,32042 | 4,5493E18  |

|           |       |         |            |
|-----------|-------|---------|------------|
| 546,16572 | --    | 6,27212 |            |
| 548,99669 | 16830 | 6,22418 |            |
| 551,84232 | 16710 | 6,17661 | 4,73478E18 |
| 554,70271 | 16520 | 6,1294  |            |
| 557,57793 | 16530 | 6,08256 | 4,92323E18 |
| 560,46805 | 16310 | 6,03607 | 5,03663E18 |

### 860°C

| T (K) | sheet resistance<br>(ohm/square) | hole mobility<br>(cm <sup>2</sup> /(Vs)) | hole concentration<br>(cm <sup>-3</sup> ) |
|-------|----------------------------------|------------------------------------------|-------------------------------------------|
| 24    | 11436,7                          | 55,5765                                  | 9,11784E17                                |
| 32    | 12333,8                          | 55,35259                                 | 8,6727E17                                 |
| 40    | 13019,3                          | 55,20751                                 | 8,56607E17                                |
| 48    | 13216                            | 55,61039                                 | 8,45571E17                                |
| 56    | 13291,5                          | 54,85491                                 | 8,50834E17                                |
| 64    | 13391,2                          | 54,87356                                 | 8,40881E17                                |
| 72    | 13545,1                          | 54,02235                                 | 8,38336E17                                |
| 80    | 13800,3                          | 53,17108                                 | 8,32131E17                                |
| 88    | 14125,8                          | 51,3753                                  | 8,37819E17                                |
| 96    | 14520,3                          | 49,51621                                 | 8,41739E17                                |
| 104   | 14995,3                          | 48,00679                                 | 8,4E17                                    |
| 112   | 15498,8                          | 46,22866                                 | 8,43151E17                                |
| 120   | 16034,8                          | 44,076                                   | 8,533E17                                  |
| 128   | 16617,9                          | 42,10009                                 | 8,582E17                                  |
| 136   | 17298,5                          | 40,26333                                 | 8,634E17                                  |
| 144   | 17978,7                          | 38,78965                                 | 8,633E17                                  |

|     |         |          |            |
|-----|---------|----------|------------|
| 152 | 18663,9 | 37,0707  | 8,651E17   |
| 160 | 19488,7 | 35,40467 | 8,71634E17 |
| 164 | 20252,8 | 33,75599 | 8,739E17   |
| 168 | 21186,9 | 32,16248 | 8,79438E17 |
| 172 | 22096,6 | 31,28789 | 8,85651E17 |
| 176 | 22554,9 | 30,57595 | 8,8772E17  |
| 180 | 23026,3 | 30,0062  | 8,85035E17 |
| 184 | 23534,7 | 29,06136 | 8,93371E17 |
| 188 | 24073,1 | 27,75447 | 9,1573E17  |
| 192 | 24591,2 | 27,01521 | 9,22755E17 |
| 196 | 25071,8 | 26,80982 | 9,118E17   |
| 200 | 25567,4 | 25,84818 | 9,257E17   |
| 204 | 26120,4 | 25,3354  | 9,263E17   |
| 208 | 26631,8 | 24,91053 | 9,25E17    |
| 212 | 27124,1 | 24,01675 | 9,417E17   |
| 216 | 27634,6 | 23,7316  | 9,34829E17 |
| 220 | 28172,2 | 22,97585 | 9,499E17   |
| 224 | 28637,2 | 22,14634 | 9,681E17   |
| 228 | 29151,3 | 21,67179 | 9,73E17    |
| 232 | 29639,6 | 20,9631  | 9,921E17   |
| 236 | 30051,7 | 20,3001  | 1,009E18   |
| 240 | 30513,4 | 19,90659 | 1,016E18   |
| 244 | 30902,2 | 19,42528 | 1,027E18   |
| 248 | 31328,7 | 18,85947 | 1,047E18   |

|           |         |          |            |
|-----------|---------|----------|------------|
| 252       | 31652,2 | 18,24302 | 1,071E18   |
| 256       | 31988,5 | 17,74962 | 1,09E18    |
| 260       | 32304,6 | 17,14517 | 1,12E18    |
| 264       | 32547,7 | 16,56724 | 1,151E18   |
| 268       | 32775,9 | 16,80858 | 1,128E18   |
| 272       | 32964   | 15,71692 | 1,201E18   |
| 276       | 33110,8 | 15,2708  | 1,232E18   |
| 280       | 33220,6 | 14,86457 | 1,263E18   |
| 284       | 33290,8 | 14,54162 | 1,29E18    |
| 288       | 33317,9 | 14,37823 | 1,305E18   |
| 292       | 33309,2 | 14,00666 | 1,341E18   |
| 296       | 33274,9 | 13,64431 | 1,378E18   |
| 300       | 33241,4 | 13,31809 | 1,416E18   |
| 302,86555 | 33141,7 | 13,69576 | 1,37994E18 |
| 304,1563  |         |          | --         |
| 306,75434 | 33070   | 13,43524 | 1,40797E18 |
| 309,37456 |         |          | --         |
| 312,01717 | 32970   | 13,09557 | 1,45064E18 |
| 314,68235 |         |          | --         |
| 316,02346 | 32880   | 12,84646 | 1,48328E18 |
| 320,0812  |         |          | --         |
| 322,81526 | 32700   | 12,44177 | 1,53998E18 |
| 324,19103 |         |          | --         |
| 326,9602  | 32530   | 12,2051  | 1,57903E18 |

|           |       |          |            |
|-----------|-------|----------|------------|
| 329,75302 |       |          | --         |
| 332,56969 | 32310 | 11,89653 | 1,62954E18 |
| 335,41043 |       |          | --         |
| 338,27542 | 32080 | 11,59576 | 1,68487E18 |
| 339,71709 |       |          | --         |
| 342,61887 | 31820 | 11,37518 | 1,73216E18 |
| 345,54545 | 31580 | 11,23047 | 1,76226E18 |
| 348,49701 |       |          | --         |
| 351,4738  | 31280 | 10,94654 | 1,82531E18 |
| 354,476   | --    |          | --         |
| 355,98671 | --    | 10,73831 | 1,87872E18 |
| 359,02747 |       |          | --         |
| 362,0942  | 30830 | 10,46682 | 1,94948E18 |
| 365,18712 |       |          | --         |
| 366,74348 | 30500 | 10,26772 | 2,0076E18  |
| 369,87612 |       |          | --         |
| 371,45246 | 30170 | 10,07241 | 2,07112E18 |
| 374,62532 | --    |          | --         |
| 377,82528 | 29410 | 9,81776  | 2,15359E18 |
| 379,4355  |       |          | --         |
| 382,67655 | 29060 | 9,631    | 2,21862E18 |
| 385,94529 |       |          | --         |
| 387,59011 | 28580 | 9,4478   | 2,28982E18 |
| 390,90082 |       |          | --         |

|           |       |         |            |
|-----------|-------|---------|------------|
| 392,56676 | --    | 9,26808 | 2,36783E18 |
| 395,91997 | --    |         | --         |
| 399,30183 | --    | 9,03377 | 2,41821E18 |
| 401,00358 | --    |         | --         |
| 404,42886 | 27700 | 8,86192 | 2,54608E18 |
| 407,8834  |       |         | --         |
| 409,62172 | --    | 8,69335 | 2,63831E18 |
| 411,36744 |       |         | --         |
| 414,88125 | 27210 | 8,52799 | 2,68062E18 |
| 418,42507 | 26870 | 8,41949 | 2,76265E18 |
| 420,20831 |       |         | --         |
| 423,79764 | 26600 | 8,25934 | 2,84481E18 |
| 425,60378 |       |         | --         |
| 429,23919 | 25980 | 8,10223 | 2,96918E18 |

## 900°C

| T (K) | sheet resistance<br>(ohm/square) | hole mobility<br>(cm <sup>2</sup> /(Vs)) | hole concentration<br>(cm <sup>-3</sup> ) |
|-------|----------------------------------|------------------------------------------|-------------------------------------------|
| 24    | 15819,5                          | 53,23575                                 | 7,42137E17                                |
| 32    | 15700,3                          | 57,01056                                 | 6,98259E17                                |
| 40    | 15640,6                          | 56,60493                                 | 7,05947E17                                |
| 48    | 15687,9                          | 57,70159                                 | 6,90442E17                                |
| 56    | 15887,9                          | 54,54166                                 | 7,21249E17                                |
| 64    | 16222,5                          | 56,30918                                 | 6,842E17                                  |
| 72    | 16570,4                          | 54,87032                                 | 6,874E17                                  |

|     |         |          |            |
|-----|---------|----------|------------|
| 80  | 17052,2 | 53,71854 | 6,823E17   |
| 88  | 17571   | 52,75879 | 6,742E17   |
| 96  | 18158,5 | 51,05495 | 6,74159E17 |
| 104 | 18831,9 | 48,92153 | 6,784E17   |
| 112 | 19511,3 | 46,79725 | 6,845E17   |
| 120 | 20277   | 45,0038  | 6,849E17   |
| 128 | 21077,2 | 42,8572  | 6,919E17   |
| 136 | 22024,6 | 39,64142 | 7,15851E17 |
| 144 | 22899,1 | 38,5776  | 7,075E17   |
| 152 | 23861,5 | 37,48257 | 6,988E17   |
| 160 | 24893,9 | 35,61213 | 7,05E17    |
| 164 | 25451,5 | 34,65008 | 7,087E17   |
| 168 | 25976   | 33,75042 | 7,129E17   |
| 172 | 26509,8 | 33,04764 | 7,134E17   |
| 176 | 27042,8 | 31,98383 | 7,226E17   |
| 180 | 27605,3 | 31,06556 | 7,288E17   |
| 184 | 28174   | 29,95717 | 7,4051E17  |
| 188 | 28689,9 | 29,49454 | 7,386E17   |
| 192 | 29270,2 | 28,62569 | 7,45931E17 |
| 196 | 29770,1 | 28,02218 | 7,492E17   |
| 200 | 30332   | 27,24128 | 7,564E17   |
| 204 | 30833,3 | 25,96425 | 7,807E17   |
| 208 | 31344,3 | 25,09733 | 7,945E17   |
| 212 | 31956,8 | 24,92373 | 7,847E17   |

|           |         |          |            |
|-----------|---------|----------|------------|
| 216       | 32435,8 | 24,3447  | 7,915E17   |
| 220       | 32878,5 | 23,88714 | 7,958E17   |
| 224       | 33406,9 | 23,46346 | 7,97355E17 |
| 228       | 33733,4 | 23,03189 | 8,04434E17 |
| 232       | 34260,3 | 21,21446 | 8,59918E17 |
| 236       | 34583   | 20,93335 | 8,63333E17 |
| 240       | 34970,8 | 21,50593 | 8,31029E17 |
| 244       | 35270,1 | 21,02947 | 8,42646E17 |
| 248       | 35558,2 | 20,64645 | 8,51324E17 |
| 252       | 35819,8 | 20,08522 | 8,68721E17 |
| 256       | 36056,6 | 19,67499 | 8,8101E17  |
| 260       | 36153   | 18,59183 | 9,29851E17 |
| 264       | 36256,5 | 18,07217 | 9,53858E17 |
| 268       | 36330,1 | 17,36199 | 9,90864E17 |
| 272       | 36362,1 | 18,56167 | 9,26006E17 |
| 276       | 36340,3 | 18,25291 | 9,42235E17 |
| 280       | 36322,9 | 17,85724 | 9,63574E17 |
| 284       | 36186,5 | 17,4733  | 9,88459E17 |
| 288       | 35987,6 | 15,56238 | 1,11597E18 |
| 292       | 35916,8 | 16,94415 | 1,02698E18 |
| 296       | 35670,3 | 15,56681 | 1,12557E18 |
| 300       | 35467,4 | 14,26059 | 1,2357E18  |
| 299,3994  | 35470   | 15,635   | 1,12699E18 |
| 300,09009 | 35460   | 15,58635 | 1,13083E18 |

|           |       |          |            |
|-----------|-------|----------|------------|
| 300,78078 | 35440 | 15,53795 | 1,13499E18 |
| 302,16216 | 35420 | 15,44194 | 1,14269E18 |
| 303,54354 | 35400 | 15,34696 | 1,15041E18 |
| 305,61562 | 35370 | 15,20638 | 1,16203E18 |
| 306,30631 | 35330 | 15,16002 | 1,16691E18 |
| 308,37838 | 35280 | 15,02239 | 1,17927E18 |
| 310,45045 | 35230 | 14,88693 | 1,19169E18 |
| 312,52252 | 35160 | 14,75357 | 1,20485E18 |
| 314,59459 | 35100 | 14,62228 | 1,21775E18 |
| 316,66667 | 35030 | 14,493   | 1,23107E18 |
| 318,04805 | 34950 | 14,40792 | 1,24117E18 |
| 320,12012 | 34870 | 14,28192 | 1,25499E18 |
| 322,19219 | 34790 | 14,15781 | 1,26891E18 |
| 324,26426 | 34700 | 14,03558 | 1,28328E18 |
| 326,33634 | 34610 | 13,91516 | 1,29775E18 |
| 328,40841 | 34520 | 13,79653 | 1,31232E18 |
| 330,48048 | 34420 | 13,67965 | 1,32738E18 |
| 332,55255 | 34320 | 13,56448 | 1,34255E18 |
| 334,62462 | 34220 | 13,45099 | 1,35783E18 |
| 336,00601 | 34110 | 13,37624 | 1,36982E18 |
| 338,07808 | 34010 | 13,26547 | 1,38532E18 |
| 340,15015 | 33900 | 13,15628 | 1,40135E18 |
| 342,22222 | 33790 | 13,04864 | 1,41751E18 |
| 344,29429 | 33670 | 12,94253 | 1,43423E18 |

|           |       |          |            |
|-----------|-------|----------|------------|
| 346,36637 | 33560 | 12,8379  | 1,45065E18 |
| 348,43844 | 33430 | 12,73474 | 1,46809E18 |
| 350,51051 | 33320 | 12,63302 | 1,4848E18  |
| 352,58258 | 33190 | 12,5327  | 1,50255E18 |
| 354,65465 | 33070 | 12,43375 | 1,52E18    |
| 356,03604 | 32940 | 12,36854 | 1,53404E18 |
| 358,7988  | 32810 | 12,23989 | 1,55631E18 |
| 360,87087 | 32670 | 12,14492 | 1,5752E18  |
| 362,25225 | 32540 | 12,08232 | 1,58969E18 |
| 364,32432 | 32410 | 11,98946 | 1,60843E18 |
| 366,3964  | 32280 | 11,89783 | 1,62734E18 |
| 368,46847 | 32150 | 11,80742 | 1,64643E18 |
| 370,54054 | 32010 | 11,71819 | 1,66622E18 |
| 372,61261 | 31870 | 11,63014 | 1,68622E18 |
| 374,68468 | 31740 | 11,54322 | 1,70587E18 |
| 376,75676 | 31600 | 11,45743 | 1,72626E18 |
| 378,82883 | 31460 | 11,37274 | 1,74685E18 |
| 380,9009  | 31330 | 11,28914 | 1,76709E18 |
| 382,97297 | 31200 | 11,20659 | 1,78752E18 |
| 384,35435 | 31070 | 11,15215 | 1,80377E18 |
| 386,42643 | 30930 | 11,07133 | 1,82516E18 |
| 388,4985  | 30790 | 10,99153 | 1,84677E18 |
| 390,57057 | 30650 | 10,91273 | 1,8686E18  |
| 393,33333 | 30500 | 10,80917 | 1,89578E18 |

|           |       |          |            |
|-----------|-------|----------|------------|
| 394,71471 | 30360 | 10,75804 | 1,91357E18 |
| 397,47748 | 30210 | 10,65701 | 1,94131E18 |
| 399,54955 | 30060 | 10,58232 | 1,96476E18 |
| 400,93093 | 29910 | 10,53303 | 1,98386E18 |
| 403,003   | 29750 | 10,45984 | 2,00848E18 |
| 405,07508 | 29600 | 10,38753 | 2,03271E18 |
| 407,14715 | 29440 | 10,31609 | 2,05791E18 |
| 409,21922 | 29280 | 10,24549 | 2,08342E18 |
| 411,29129 | 29120 | 10,17574 | 2,10922E18 |
| 413,36336 | 28960 | 10,1068  | 2,13534E18 |
| 415,43544 | 28800 | 10,03867 | 2,16178E18 |
| 417,50751 | 28640 | 9,97134  | 2,18854E18 |
| 419,57958 | 28480 | 9,90479  | 2,21562E18 |
| 421,65165 | 28320 | 9,839    | 2,24303E18 |
| 423,03303 | 28150 | 9,79557  | 2,26658E18 |
| 425,10511 | 27990 | 9,73104  | 2,29466E18 |
| 427,17718 | 27820 | 9,66725  | 2,32391E18 |
| 429,24925 | 27650 | 9,60418  | 2,35356E18 |
| 431,32132 | 27490 | 9,54182  | 2,38273E18 |
| 433,39339 | 27320 | 9,48016  | 2,41315E18 |
| 435,46547 | 27160 | 9,41919  | 2,44307E18 |
| 437,53754 | 26990 | 9,35891  | 2,4743E18  |
| 439,60961 | 26830 | 9,29928  | 2,50501E18 |
| 441,68168 | 26670 | 9,24032  | 2,53612E18 |

|           |       |         |            |
|-----------|-------|---------|------------|
| 443,75375 | 26500 | 9,18201 | 2,5686E18  |
| 445,82583 | 26340 | 9,12433 | 2,60054E18 |
| 447,8979  | 26170 | 9,06728 | 2,6339E18  |
| 449,96997 | 26010 | 9,01084 | 2,6667E18  |
| 451,35135 | 25840 | 8,97356 | 2,6954E18  |
| 453,42342 | 25670 | 8,91813 | 2,73011E18 |
| 455,4955  | 25500 | 8,8633  | 2,76531E18 |
| 457,56757 | 25340 | 8,80905 | 2,79991E18 |
| 459,63964 | 25190 | 8,75538 | 2,83385E18 |
| 461,71171 | 25030 | 8,70227 | 2,86937E18 |
| 463,78378 | 24870 | 8,64972 | 2,90538E18 |
| 465,85586 | 24720 | 8,59772 | 2,94068E18 |
| 467,92793 | 24560 | 8,54626 | 2,97766E18 |
| 469,30931 | 24410 | 8,51225 | 3,00793E18 |
| 470,69069 | 24300 | 8,47848 | 3,03358E18 |
| 471,38138 | 24220 | 8,46168 | 3,04965E18 |
| 472,07207 | 24170 | 8,44493 | 3,06963E18 |
| 472,76276 | 24130 | 8,42825 | 3,0821E18  |
| 473,45345 | 24110 | 8,41162 | 3,06274E18 |
| 474,14414 | 24470 | 8,39505 | 3,05744E18 |
| 476,21622 | 24400 | 8,34568 | 3,06922E18 |
| 477,5976  | 24300 | 8,31304 | 3,09395E18 |
| 479,66967 | 24200 | 8,2645  | 3,12498E18 |
| 481,05105 | 24090 | 8,23242 | 3,15149E18 |

|           |       |         |            |
|-----------|-------|---------|------------|
| 483,12312 | 23970 | 8,18469 | 3,18573E18 |
| 485,1952  | 23860 | 8,13745 | 3,219E18   |
| 487,26727 | 23730 | 8,09068 | 3,25535E18 |
| 489,33934 | 23610 | 8,04437 | 3,29073E18 |
| 491,41141 | 23480 | 7,99852 | 3,32792E18 |
| 493,48348 | 23350 | 7,95313 | 3,36554E18 |
| 495,55556 | 23220 | 7,90818 | 3,40362E18 |
| 497,62763 | 23080 | 7,86367 | 3,44365E18 |
| 499,6997  | 22950 | 7,81959 | 3,48268E18 |
| 501,08108 | 22820 | 7,79045 | 3,51562E18 |
| 503,15315 | 22690 | 7,74708 | 3,55556E18 |
| 505,22523 | 22560 | 7,70413 | 3,59598E18 |
| 507,2973  | 22430 | 7,6616  | 3,6369E18  |
| 509,36937 | 22310 | 7,61947 | 3,67668E18 |
| 511,44144 | 22190 | 7,57774 | 3,71692E18 |
| 513,51351 | 22060 | 7,53641 | 3,75933E18 |
| 515,58559 | 21950 | 7,49547 | 3,7988E18  |
| 517,65766 | 21830 | 7,45492 | 3,84046E18 |
| 519,72973 | 21710 | 7,41474 | 3,88261E18 |
| 521,11111 | 21600 | 7,38817 | 3,91642E18 |
| 523,18318 | 21480 | 7,34861 | 3,9595E18  |
| 525,25526 | 21360 | 7,30943 | 4,00309E18 |
| 527,32733 | 21250 | 7,2706  | 4,0453E18  |
| 529,3994  | 21140 | 7,23214 | 4,08798E18 |

|           |       |         |            |
|-----------|-------|---------|------------|
| 531,47147 | 21020 | 7,19402 | 4,1331E18  |
| 533,54354 | 20910 | 7,15625 | 4,17677E18 |
| 535,61562 | 20790 | 7,11883 | 4,22296E18 |
| 537,68769 | 20680 | 7,08175 | 4,26765E18 |
| 539,75976 | 20560 | 7,045   | 4,31495E18 |
| 541,14114 | 20450 | 7,02068 | 4,35319E18 |
| 543,21321 | 20330 | 6,98448 | 4,40158E18 |
| 545,28529 | 20210 | 6,94861 | 4,45057E18 |
| 547,35736 | 20090 | 6,91305 | 4,50019E18 |
| 549,42943 | 19970 | 6,87781 | 4,55043E18 |
| 551,5015  | 19860 | 6,84287 | 4,59899E18 |
| 553,57357 | 19740 | 6,80825 | 4,65047E18 |
| 555,64565 | 19630 | 6,77393 | 4,70023E18 |
| 557,71772 | 19520 | 6,73991 | 4,75057E18 |
| 559,78979 | 19400 | 6,70619 | 4,804E18   |
| 561,86186 | 19300 | 6,67275 | 4,85308E18 |
| 563,93393 | 19200 | 6,63961 | 4,90271E18 |
| 565,31532 | 19090 | 6,61767 | 4,94731E18 |
| 567,38739 | 19000 | 6,585   | 4,9954E18  |
| 569,45946 | 18900 | 6,55261 | 5,04665E18 |
| 571,53153 | 18810 | 6,5205  | 5,09578E18 |
| 573,6036  | 18710 | 6,48866 | 5,14815E18 |
| 575,67568 | 18620 | 6,45709 | 5,19833E18 |
| 577,74775 | 18530 | 6,42578 | 5,24903E18 |

|           |       |         |            |
|-----------|-------|---------|------------|
| 579,81982 | 18440 | 6,39474 | 5,30025E18 |
| 581,89189 | 18350 | 6,36396 | 5,35201E18 |
| 583,96396 | 18260 | 6,33343 | 5,40431E18 |
| 585,34535 | 18180 | 6,31322 | 5,44547E18 |
| 588,10811 | 18100 | 6,27314 | 5,50448E18 |
| 590,18018 | 18020 | 6,24336 | 5,55529E18 |
| 592,25225 | 17950 | 6,21383 | 5,60345E18 |
| 594,32432 | 17900 | 6,18455 | 5,64572E18 |
| 596,3964  | 17850 | 6,1555  | 5,68825E18 |
| 598,46847 | 17800 | 6,12669 | 5,73105E18 |
| 600,54054 | 17740 | 6,09811 | 5,77738E18 |

**Figure 5:** Hole density (light green symbol) as a function of temperature for sample annealed at 860 °C in N<sub>2</sub> + O<sub>2</sub>. The values at low temperature had been fitted (light green line) to obtain 2DHG contribution. This contribution has been removed to have just Mg impurities contribution (dark green symbol). Activation energy has been estimated by fitting the hole concentration of just Mg impurities after subtracting of 2DHG hole density (black line). In the inset, comparison between our results (dark green 780 °C, light green 860 °C and magenta 900 °C) and literature data from ● Brochen et al., ✱ Namkoong et al., ↓ Leroux et al., ♦ Konczewicz et al., ❖ Nakayama et al., ◆ Tanaka et al., □ Nguyen et al., ⊕ Kim et al., ⊕ Huang et al., ☆ Nikishin et al., □ Nakano et al., □ Kozodoy et al., ○ Ke et al., □ Gotz et al.. The solid lines represent simulations for different ionization energy values according to equation  $E_a = E_{a0} - \alpha N_A^{1/3}$  [27] where  $\alpha = \Gamma(2/3) \cdot (4\pi/3)^{1/3} (q^2/4\pi\epsilon)$  [28].

| T (K) | total hole density (cm <sup>-2</sup> ) | bulk hole density (cm <sup>-2</sup> ) |
|-------|----------------------------------------|---------------------------------------|
| 24    | 9,11784E12                             | 7,087E11                              |
| 32    | 8,6727E12                              | 2,63564E11                            |
| 40    | 8,56607E12                             | 1,56936E11                            |
| 48    | 8,45571E12                             | 4,65721E10                            |
| 56    | 8,50834E12                             | 9,92053E10                            |
| 64    | 8,40881E12                             | -3,25947E8                            |

|     |            |             |
|-----|------------|-------------|
| 72  | 8,38336E12 | -2,57807E10 |
| 80  | 8,32131E12 | -8,78331E10 |
| 88  | 8,37819E12 | -3,09509E10 |
| 96  | 8,41739E12 | 8,25162E9   |
| 104 | 8,4E12     | -9,13838E9  |
| 112 | 8,43151E12 | 2,23672E10  |
| 120 | 8,533E12   | 1,23862E11  |
| 128 | 8,582E12   | 1,72862E11  |
| 136 | 8,634E12   | 2,24862E11  |
| 144 | 8,633E12   | 2,23862E11  |
| 152 | 8,651E12   | 2,41862E11  |
| 160 | 8,71634E12 | 3,07206E11  |
| 164 | 8,739E12   | 3,29862E11  |
| 168 | 8,79438E12 | 3,85238E11  |
| 172 | 8,85651E12 | 4,47376E11  |
| 176 | 8,8772E12  | 4,68058E11  |
| 180 | 8,85035E12 | 4,41208E11  |
| 184 | 8,93371E12 | 5,24575E11  |
| 188 | 9,1573E12  | 7,4816E11   |
| 192 | 9,22755E12 | 8,18407E11  |
| 196 | 9,118E12   | 7,08862E11  |
| 200 | 9,257E12   | 8,47862E11  |
| 204 | 9,263E12   | 8,53862E11  |

|     |            |            |
|-----|------------|------------|
| 208 | 9,25E12    | 8,40862E11 |
| 212 | 9,417E12   | 1,00786E12 |
| 216 | 9,34829E12 | 9,39152E11 |
| 220 | 9,499E12   | 1,08986E12 |
| 224 | 9,681E12   | 1,27186E12 |
| 228 | 9,73E12    | 1,32086E12 |
| 232 | 9,921E12   | 1,51186E12 |
| 236 | 1,009E13   | 1,68086E12 |
| 240 | 1,016E13   | 1,75086E12 |
| 244 | 1,027E13   | 1,86086E12 |
| 248 | 1,047E13   | 2,06086E12 |
| 252 | 1,071E13   | 2,30086E12 |
| 256 | 1,09E13    | 2,49086E12 |
| 260 | 1,12E13    | 2,79086E12 |
| 264 | 1,151E13   | 3,10086E12 |
| 268 | 1,128E13   | 2,87086E12 |
| 272 | 1,201E13   | 3,60086E12 |
| 276 | 1,232E13   | 3,91086E12 |
| 280 | 1,263E13   | 4,22086E12 |
| 284 | 1,29E13    | 4,49086E12 |
| 288 | 1,305E13   | 4,64086E12 |
| 292 | 1,341E13   | 5,00086E12 |
| 296 | 1,378E13   | 5,37086E12 |

|        |            |            |
|--------|------------|------------|
| 300    | 1,416E13   | 5,75086E12 |
| 302,43 | 1,37994E13 | 5,39025E12 |
| 304,53 | --         | --         |
| 306,88 | 1,40797E13 | 5,6706E12  |
| 309,23 | --         | --         |
| 311,83 | 1,45064E13 | 6,09727E12 |
| 314,33 | --         | --         |
| 316,93 | 1,48328E13 | 6,42365E12 |
| 319,53 | --         | --         |
| 322,13 | 1,53998E13 | 6,99062E12 |
| 324,78 | --         | --         |
| 327,43 | 1,57903E13 | 7,38121E12 |
| 330,03 | --         | --         |
| 332,68 | 1,62954E13 | 7,88625E12 |
| 335,38 | --         | --         |
| 337,93 | 1,68487E13 | 8,43957E12 |
| 340,63 | --         | --         |
| 343,23 | 1,73216E13 | 8,91248E12 |
| 345,93 | 1,76226E13 | 9,21346E12 |
| 348,58 | --         | --         |
| 351,23 | 1,82531E13 | 9,84396E12 |
| 353,88 | --         | --         |
| 356,53 | 1,87872E13 | 1,03781E13 |

|        |            |            |
|--------|------------|------------|
| 359,13 | --         | --         |
| 361,83 | 1,94948E13 | 1,10856E13 |
| 364,43 | --         | --         |
| 367,08 | 2,0076E13  | 1,16668E13 |
| 369,83 | --         | --         |
| 372,48 | 2,07112E13 | 1,2302E13  |
| 375,13 | --         | --         |
| 377,83 | 2,15359E13 | 1,31268E13 |
| 380,43 | --         | --         |
| 383,13 | 2,21862E13 | 1,3777E13  |
| 385,83 | --         | --         |
| 388,53 | 2,28982E13 | 1,44891E13 |
| 391,33 | --         | --         |
| 393,93 | 2,36783E13 | 1,52691E13 |
| 396,63 | --         | --         |
| 399,33 | 2,41821E13 | 1,57729E13 |
| 401,93 | --         | --         |
| 404,73 | 2,54608E13 | 1,70517E13 |
| 407,33 | --         | --         |
| 410,03 | 2,63831E13 | 1,7974E13  |
| 412,73 | --         | --         |
| 415,33 | 2,68062E13 | 1,83971E13 |
| 417,93 | 2,76265E13 | 1,92174E13 |

|        |            |            |
|--------|------------|------------|
| 420,73 | --         | --         |
| 423,33 | 2,84481E13 | 2,0039E13  |
| 426,03 | --         | --         |
| 428,83 | 2,96918E13 | 2,12827E13 |
| 431,43 | --         | --         |
| 432,03 | 3,02257E13 | 2,18165E13 |
| 434,13 | --         | --         |
| 436,13 | 3,10841E13 | 2,2675E13  |
| 438,33 | --         | --         |
| 440,53 | 3,17591E13 | 2,33499E13 |
| 442,73 | --         | --         |
| 443,83 | 3,24253E13 | 2,40161E13 |
| 445,03 | --         | --         |
| 447,33 | 3,31609E13 | 2,47518E13 |
| 449,83 | --         | --         |
| 451,03 | 3,39579E13 | 2,55488E13 |
| 453,63 | --         | --         |
| 454,93 | 3,47927E13 | 2,63835E13 |
| 457,53 | --         | --         |
| 458,93 | 3,55933E13 | 2,71841E13 |
| 461,83 | --         | --         |
| 463,23 | 3,64159E13 | 2,80068E13 |
| 464,63 | --         | --         |

|        |            |            |
|--------|------------|------------|
| 467,63 | 3,72772E13 | 2,88681E13 |
| 469,23 | --         | --         |
| 472,33 | 3,82289E13 | 2,98198E13 |
| 474,03 | --         | --         |
| 475,73 | 3,90748E13 | 3,06657E13 |
| 477,33 | --         | --         |
| 479,03 | 3,98728E13 | 3,14636E13 |
| 480,83 | --         | --         |
| 482,53 | --         | --         |
| 486,23 | 4,15367E13 | 3,31275E13 |
| 488,03 | --         | --         |
| 489,93 | 4,25861E13 | 3,4177E13  |
| 491,93 | --         | --         |
| 493,93 | 4,36486E13 | 3,52395E13 |
| 495,93 | --         | --         |
| 498,03 | 4,46612E13 | 3,6252E13  |
| 500,03 | --         | --         |
| 502,23 | 4,5809E13  | 3,73999E13 |
| 504,33 | --         | --         |
| 506,73 | 4,69939E13 | 3,85848E13 |
| 509,13 | --         | --         |
| 511,63 | 4,82173E13 | 3,98082E13 |
| 516,73 | 4,94088E13 | 4,09996E13 |

|        |            |            |
|--------|------------|------------|
| 519,33 | --         | --         |
| 522,23 | 5,10874E13 | 4,26783E13 |
| 525,13 | --         | --         |
| 528,23 | 5,27284E13 | 4,43193E13 |
| 531,23 | --         | --         |
| 534,33 | 5,44857E13 | 4,60765E13 |
| 537,33 | --         | --         |
| 540,13 | 5,5924E13  | 4,75149E13 |
| 542,03 | --         | --         |
| 543,03 | 5,71431E13 | 4,87339E13 |
| 545,33 | --         | --         |
| 549,53 | 5,83932E13 | 4,99841E13 |
| 553,53 | --         | --         |
| 557,03 | 6,04408E13 | 5,20317E13 |
| 560,03 | 6,17434E13 | 5,33343E13 |

Data in the inset

| Temperature RTP (°C) | Acceptor concentration (cm <sup>-3</sup> ) | Activation energy (eV) | err Ea |
|----------------------|--------------------------------------------|------------------------|--------|
| 780                  | 2E+19                                      | 0,126                  | 0,008  |
| 860                  | 2E+19                                      | 0,125                  | 0,011  |
| 900                  | 2E+19                                      | 0,132                  | 0,006  |

**Figure 6:** Comparison of our data (red solid circles and the literature data from ● Nakajima et al.<sup>27</sup>, ↓ Ng et al.<sup>13</sup> ♦ Beckmann et al.<sup>28</sup> □ Shao et al.<sup>12</sup> □ Zhang et al.<sup>29</sup> ⊕ Nakajima et al.<sup>30</sup>. Figures (a) and (b) show the 2DHG hole density and hole mobility, respectively, measured at  $T < 100$  K as a function of the Al content (%) in the AlGaN layer. Figure (c) shows the 2DHG hole density as a function of the 2DHG hole mobility.

| samples  | AlGaN |           | p-GaN     | Mg                  | $\mu$ 2DHG            | Rs                   | n 2DHG             | ns (300            | n 2DHG             | $\mu$ 2DHG            | Rs                   |
|----------|-------|-----------|-----------|---------------------|-----------------------|----------------------|--------------------|--------------------|--------------------|-----------------------|----------------------|
|          | AlGaN | Thickness | thickness |                     | (77K)                 | (77K)                | (77 K)             | K)                 | (300 K)            | (300K)                | (300K)               |
|          | (Al%) | (nm)      | (nm)      | (cm <sup>-3</sup> ) | (cm <sup>2</sup> /Vs) | ( $\Omega/\square$ ) | (cm <sup>2</sup> ) | (cm <sup>2</sup> ) | (cm <sup>2</sup> ) | (cm <sup>2</sup> /Vs) | ( $\Omega/\square$ ) |
| pristine | 20    | 18        | 100       | 2.00E+19            | 60                    | 17382                | 6.00E+12           | 9.00E+12           | 6.00E+12           | 14                    | 46095                |
| 780      | 20    | 18        | 100       | 2.00E+19            | 56                    | 18073                | 7.00E+12           | 1,1E13             | 7.00E+12           | 15                    | 35196                |
| 860      | 20    | 18        | 100       | 2.00E+19            | 53                    | 14995                | 8.00E+12           | 1,4E13             | 8.00E+12           | 13                    | 32876                |
| 900      | 20    | 18        | 100       | 2.00E+19            | 54                    | 17052                | 7.00E+12           | 1,1E13             | 7.00E+12           | 14                    | 35467                |

**Figure 7:** Comparison of sheet resistance (a), hole mobility (b), and hole density (c) for 2DEG (blue symbols) and 2DHG (green symbols) of annealed sample at 860 °C in N<sub>2</sub> + O<sub>2</sub>.

## 2DHG

| T (K) | sheet resistance (ohm/square) | hole mobility (cm <sup>2</sup> /(Vs)) | hole density(cm <sup>-2</sup> ) |
|-------|-------------------------------|---------------------------------------|---------------------------------|
| 8     | 12333,8                       |                                       |                                 |
| 16    | 13019,3                       |                                       |                                 |
| 24    | 13216                         | 55,5765                               | 9,11784E12                      |
| 32    | 13291,5                       | 55,35259                              | 8,6727E12                       |
| 40    | 13391,2                       | 55,20751                              | 8,56607E12                      |
| 48    | 13545,1                       | 55,61039                              | 8,45571E12                      |
| 56    | 13800,3                       | 54,85491                              | 8,50834E12                      |
| 64    | 14125,8                       | 54,87356                              | 8,40881E12                      |
| 72    | 14520,3                       | 54,02235                              | 8,38336E12                      |

|     |         |          |            |
|-----|---------|----------|------------|
| 80  | 14995,3 | 53,17108 | 8,32131E12 |
| 88  | 15498,8 | 51,3753  | 8,37819E12 |
| 96  | 16034,8 | 49,51621 | 8,41739E12 |
| 104 | 16617,9 | 48,00679 | 8,4E12     |
| 112 | 17298,5 | 46,22866 | 8,43151E12 |
| 120 | 17978,7 | 44,076   | 8,533E12   |
| 128 | 18663,9 | 42,10009 | 8,582E12   |
| 136 | 19488,7 | 40,26333 | 8,634E12   |
| 144 | 20252,8 | 38,78965 | 8,633E12   |
| 152 | 21186,9 | 37,0707  | 8,651E12   |
| 160 | 22096,6 | 35,40467 | 8,71634E12 |
| 164 | 22554,9 | 33,75599 | 8,739E12   |
| 168 | 23026,3 | 32,16248 | 8,79438E12 |
| 172 | 23534,7 | 31,28789 | 8,85651E12 |
| 176 | 24073,1 | 30,57595 | 8,8772E12  |
| 180 | 24591,2 | 30,0062  | 8,85035E12 |
| 184 | 25071,8 | 29,06136 | 8,93371E12 |

|     |         |          |           |
|-----|---------|----------|-----------|
| 188 | 25567,4 | 27,75447 | 9,1573E12 |
|-----|---------|----------|-----------|

|     |         |          |            |
|-----|---------|----------|------------|
| 192 | 26120,4 | 27,01521 | 9,22755E12 |
|-----|---------|----------|------------|

|     |         |          |          |
|-----|---------|----------|----------|
| 196 | 26631,8 | 26,80982 | 9,118E12 |
|-----|---------|----------|----------|

|     |         |          |          |
|-----|---------|----------|----------|
| 200 | 27124,1 | 25,84818 | 9,257E12 |
|-----|---------|----------|----------|

|     |         |         |          |
|-----|---------|---------|----------|
| 204 | 27634,6 | 25,3354 | 9,263E12 |
|-----|---------|---------|----------|

|     |         |          |         |
|-----|---------|----------|---------|
| 208 | 28172,2 | 24,91053 | 9,25E12 |
|-----|---------|----------|---------|

|     |         |          |          |
|-----|---------|----------|----------|
| 212 | 28637,2 | 24,01675 | 9,417E12 |
|-----|---------|----------|----------|

|     |         |         |            |
|-----|---------|---------|------------|
| 216 | 29151,3 | 23,7316 | 9,34829E12 |
|-----|---------|---------|------------|

|     |         |          |          |
|-----|---------|----------|----------|
| 220 | 29639,6 | 22,97585 | 9,499E12 |
|-----|---------|----------|----------|

|     |         |          |          |
|-----|---------|----------|----------|
| 224 | 30051,7 | 22,14634 | 9,681E12 |
|-----|---------|----------|----------|

|     |         |          |         |
|-----|---------|----------|---------|
| 228 | 30513,4 | 21,67179 | 9,73E12 |
|-----|---------|----------|---------|

|     |         |         |          |
|-----|---------|---------|----------|
| 232 | 30902,2 | 20,9631 | 9,921E12 |
|-----|---------|---------|----------|

|     |         |         |          |
|-----|---------|---------|----------|
| 236 | 31328,7 | 20,3001 | 1,009E13 |
|-----|---------|---------|----------|

|     |         |          |          |
|-----|---------|----------|----------|
| 240 | 31652,2 | 19,90659 | 1,016E13 |
|-----|---------|----------|----------|

|     |         |          |          |
|-----|---------|----------|----------|
| 244 | 31988,5 | 19,42528 | 1,027E13 |
|-----|---------|----------|----------|

|     |         |          |          |
|-----|---------|----------|----------|
| 248 | 32304,6 | 18,85947 | 1,047E13 |
|-----|---------|----------|----------|

|     |         |          |          |
|-----|---------|----------|----------|
| 252 | 32547,7 | 18,24302 | 1,071E13 |
|-----|---------|----------|----------|

|     |         |          |          |
|-----|---------|----------|----------|
| 256 | 32775,9 | 17,74962 | 1,09E13  |
| 260 | 32964   | 17,14517 | 1,12E13  |
| 264 | 33110,8 | 16,56724 | 1,151E13 |
| 268 | 33220,6 | 16,80858 | 1,128E13 |
| 272 | 33290,8 | 15,71692 | 1,201E13 |
| 276 | 33317,9 | 15,2708  | 1,232E13 |
| 280 | 33309,2 | 14,86457 | 1,263E13 |
| 284 | 33274,9 | 14,54162 | 1,29E13  |
| 288 | 33241,4 | 14,37823 | 1,305E13 |
| 292 | 33141,7 | 14,00666 | 1,341E13 |
| 296 | 33031,9 | 13,64431 | 1,378E13 |
| 300 | 32876,2 | 13,31809 | 1,416E13 |

## 2DEG

| T (K) | sheet<br>resistance<br>(ohm/square) | hole mobility<br>(cm <sup>2</sup> /(Vs)) | hole<br>density(cm <sup>-2</sup> ) |
|-------|-------------------------------------|------------------------------------------|------------------------------------|
| 5,964 | 327,147                             |                                          | 3,642E12                           |
| 5,864 | 327,129                             |                                          | 3,642E12                           |
| 4,539 | 327,109                             | 5219                                     | 3,646E12                           |
| 10    | 327,281                             | 5217                                     | 3,65E12                            |

|    |         |      |          |
|----|---------|------|----------|
| 12 | 327,404 | 5209 | 3,654E12 |
|----|---------|------|----------|

|    |         |      |         |
|----|---------|------|---------|
| 16 | 327,739 | 5200 | 3,66E12 |
|----|---------|------|---------|

|    |         |      |          |
|----|---------|------|----------|
| 20 | 328,151 | 5189 | 3,664E12 |
|----|---------|------|----------|

|    |         |      |          |
|----|---------|------|----------|
| 24 | 328,604 | 5177 | 3,668E12 |
|----|---------|------|----------|

|    |         |      |          |
|----|---------|------|----------|
| 28 | 328,995 | 5165 | 3,672E12 |
|----|---------|------|----------|

|    |         |      |          |
|----|---------|------|----------|
| 32 | 329,408 | 5153 | 3,676E12 |
|----|---------|------|----------|

|    |         |      |         |
|----|---------|------|---------|
| 36 | 329,868 | 5141 | 3,68E12 |
|----|---------|------|---------|

|    |         |      |          |
|----|---------|------|----------|
| 40 | 330,364 | 5129 | 3,682E12 |
|----|---------|------|----------|

|    |         |      |          |
|----|---------|------|----------|
| 44 | 330,872 | 5117 | 3,686E12 |
|----|---------|------|----------|

|    |         |      |          |
|----|---------|------|----------|
| 48 | 331,455 | 5105 | 3,688E12 |
|----|---------|------|----------|

|    |       |      |         |
|----|-------|------|---------|
| 52 | 332,1 | 5092 | 3,69E12 |
|----|-------|------|---------|

|    |         |      |          |
|----|---------|------|----------|
| 56 | 332,825 | 5079 | 3,692E12 |
|----|---------|------|----------|

|    |         |      |          |
|----|---------|------|----------|
| 60 | 333,626 | 5065 | 3,696E12 |
|----|---------|------|----------|

|    |         |      |          |
|----|---------|------|----------|
| 76 | 337,698 | 5000 | 3,696E12 |
|----|---------|------|----------|

|    |         |      |         |
|----|---------|------|---------|
| 92 | 343,787 | 4910 | 3,69E12 |
|----|---------|------|---------|

|     |        |      |          |
|-----|--------|------|----------|
| 108 | 353,75 | 4780 | 3,674E12 |
|-----|--------|------|----------|

|     |         |      |          |
|-----|---------|------|----------|
| 124 | 370,059 | 4578 | 3,648E12 |
|-----|---------|------|----------|

|     |         |      |          |
|-----|---------|------|----------|
| 140 | 394,462 | 4307 | 3,808E12 |
|-----|---------|------|----------|

|     |         |      |         |
|-----|---------|------|---------|
| 156 | 429,324 | 3980 | 3,79E12 |
|-----|---------|------|---------|

|     |         |      |          |
|-----|---------|------|----------|
| 172 | 476,255 | 3607 | 3,772E12 |
|-----|---------|------|----------|

|     |         |      |          |
|-----|---------|------|----------|
| 188 | 535,579 | 3228 | 3,752E12 |
|-----|---------|------|----------|

|     |         |      |          |
|-----|---------|------|----------|
| 204 | 608,631 | 2862 | 3,734E12 |
|-----|---------|------|----------|

|     |         |      |          |
|-----|---------|------|----------|
| 220 | 698,134 | 2512 | 3,712E12 |
|-----|---------|------|----------|

|     |         |      |         |
|-----|---------|------|---------|
| 236 | 802,619 | 2204 | 3,69E12 |
|-----|---------|------|---------|

|     |         |      |          |
|-----|---------|------|----------|
| 252 | 921,102 | 1934 | 3,668E12 |
|-----|---------|------|----------|

|     |         |      |          |
|-----|---------|------|----------|
| 268 | 1043,32 | 1719 | 3,642E12 |
|-----|---------|------|----------|

|     |         |  |          |
|-----|---------|--|----------|
| 284 | 1199,55 |  | 3,614E12 |
|-----|---------|--|----------|

|     |         |      |          |
|-----|---------|------|----------|
| 300 | 1369,07 | 1341 | 3,578E12 |
|-----|---------|------|----------|

|     |         |          |         |
|-----|---------|----------|---------|
| 208 | 28172,2 | 24,91053 | 9,25E12 |
|-----|---------|----------|---------|

|     |         |          |          |
|-----|---------|----------|----------|
| 212 | 28637,2 | 24,01675 | 9,417E12 |
|-----|---------|----------|----------|

|     |         |         |            |
|-----|---------|---------|------------|
| 216 | 29151,3 | 23,7316 | 9,34829E12 |
|-----|---------|---------|------------|

|     |         |          |          |
|-----|---------|----------|----------|
| 220 | 29639,6 | 22,97585 | 9,499E12 |
|-----|---------|----------|----------|

|     |         |          |          |
|-----|---------|----------|----------|
| 224 | 30051,7 | 22,14634 | 9,681E12 |
|-----|---------|----------|----------|

|     |         |          |         |
|-----|---------|----------|---------|
| 228 | 30513,4 | 21,67179 | 9,73E12 |
|-----|---------|----------|---------|

|     |         |         |          |
|-----|---------|---------|----------|
| 232 | 30902,2 | 20,9631 | 9,921E12 |
|-----|---------|---------|----------|

|     |         |         |          |
|-----|---------|---------|----------|
| 236 | 31328,7 | 20,3001 | 1,009E13 |
|-----|---------|---------|----------|

|     |         |          |          |
|-----|---------|----------|----------|
| 240 | 31652,2 | 19,90659 | 1,016E13 |
|-----|---------|----------|----------|

|     |         |          |          |
|-----|---------|----------|----------|
| 244 | 31988,5 | 19,42528 | 1,027E13 |
|-----|---------|----------|----------|

|     |         |          |          |
|-----|---------|----------|----------|
| 248 | 32304,6 | 18,85947 | 1,047E13 |
|-----|---------|----------|----------|

|     |         |          |          |
|-----|---------|----------|----------|
| 252 | 32547,7 | 18,24302 | 1,071E13 |
|-----|---------|----------|----------|

|     |         |          |         |
|-----|---------|----------|---------|
| 256 | 32775,9 | 17,74962 | 1,09E13 |
|-----|---------|----------|---------|

|     |       |          |         |
|-----|-------|----------|---------|
| 260 | 32964 | 17,14517 | 1,12E13 |
|-----|-------|----------|---------|

|     |         |          |          |
|-----|---------|----------|----------|
| 264 | 33110,8 | 16,56724 | 1,151E13 |
|-----|---------|----------|----------|

|     |         |          |          |
|-----|---------|----------|----------|
| 268 | 33220,6 | 16,80858 | 1,128E13 |
|-----|---------|----------|----------|

|     |         |          |          |
|-----|---------|----------|----------|
| 272 | 33290,8 | 15,71692 | 1,201E13 |
|-----|---------|----------|----------|

|     |         |         |          |
|-----|---------|---------|----------|
| 276 | 33317,9 | 15,2708 | 1,232E13 |
|-----|---------|---------|----------|

|     |         |          |          |
|-----|---------|----------|----------|
| 280 | 33309,2 | 14,86457 | 1,263E13 |
|-----|---------|----------|----------|

|     |         |          |         |
|-----|---------|----------|---------|
| 284 | 33274,9 | 14,54162 | 1,29E13 |
|-----|---------|----------|---------|

|     |         |          |          |
|-----|---------|----------|----------|
| 288 | 33241,4 | 14,37823 | 1,305E13 |
|-----|---------|----------|----------|

|     |         |          |          |
|-----|---------|----------|----------|
| 292 | 33141,7 | 14,00666 | 1,341E13 |
|-----|---------|----------|----------|

|     |         |          |          |
|-----|---------|----------|----------|
| 296 | 33031,9 | 13,64431 | 1,378E13 |
|-----|---------|----------|----------|

|     |         |          |          |
|-----|---------|----------|----------|
| 300 | 32876,2 | 13,31809 | 1,416E13 |
|-----|---------|----------|----------|

---
